# Supplementary material
Source: Royal Society of Chemistry journal article supplement (doi:10.1039/d5tb02866c)
Supplement: d5tb02866c1.pdf [file d5tb02866c1.pdf]

Supplementary Information

**Innovative Design of Fluorescent PLGA – 1,8-Naphthalimide Nanoparticles as Multifunctional Materials for Next-Generation Nanotechnology and Biomedicine**

*Yuriev Danil,<sup>a</sup> Tkachenko Sergey,<sup>a</sup> Ermolin Danila,<sup>b</sup> Ivanov Ilya,<sup>b</sup> Melnikov Pavel,<sup>c</sup> Malinovskaya Julia,<sup>a</sup> Ryabova Anastasia,<sup>d,e,f</sup> Mishin Alexander,<sup>g</sup> Perfilov Maxim,<sup>g</sup> Ramil Khasbiullin,<sup>h</sup> Medvedev Mikhail,<sup>b</sup> Skorb Ekaterina,<sup>b</sup> Oshchepkov Maxim,<sup>a</sup> Gelperina Svetlana<sup>a</sup> and Oshchepkov Alexander<sup>\*i,j</sup>*

- a. Mendeleev University of Chemical Technology of Russia, Miusskaya pl., 9, Moscow, 125047, Russian Federation.*
- b. Infochemistry Scientific Center, ITMO University, 9 Lomonosova Str., St. Petersburg, 191002, Russian Federation.*
- c. Rudolf Virchow Center, Center for Integrative and Translational Bioimaging, University of Würzburg, Josef-Schneider-Str. 2, Würzburg, 97080, Germany*
- d. Prokhorov General Physics Institute of the Russian Academy of Sciences, Vavilov Str. 38, Moscow, 119991, Russian Federation.*
- e. National research nuclear university MEPhI, Kashirskoye Highway 31, Moscow, 115409, Russian Federation.*
- f. RUDN University, Miklukho-Maklaya str. 6, 117198, Moscow, Russian Federation.*
- g. Shemyakin-Ovchinnikov Institute of Bioorganic Chemistry, RAS (IBCh RAS), Miklukho-Maklaya 16/10, Moscow, 117997, Russian Federation.*
- h. Frumkin Institute of Physical Chemistry and Electrochemistry Russian Academy of Sciences (IPCE RAS), 31-4, Leninsky prospect, Moscow, 119071, Russian Federation.*
- i. Martin Luther University Halle-Wittenberg, Kurt-Mothes-Straße 2, D-06120 Halle, Germany.*
- j. Max Planck Institute for the Science of Light, Department of Physics, d-91058 Erlangen, Germany*

E-mail: [aleksandr.oshchepkov@chemie.uni-halle.de](mailto:aleksandr.oshchepkov@chemie.uni-halle.de)

**Table of contents**

**Figure S1.** <sup>1</sup>H NMR spectrum of PLGA in CDCl<sub>3</sub>.

**Figure S2.** <sup>13</sup>C NMR spectrum of PLGA in CDCl<sub>3</sub>.

**Figure S3.** <sup>1</sup>H NMR spectrum of conjugate PLGA-5 in CDCl<sub>3</sub>.

**Figure S4.** <sup>13</sup>C NMR spectrum of conjugate PLGA-5 in CDCl<sub>3</sub>.

**Figure S5.** IR spectrum of unmodified PLGA and conjugate PLGA-5

**Figure S6.** Gel-permeation chromatogram

**Figure S7.** Differential scanning calorimetry (DSC) analysis of unmodified PLGA sample

**Figure S8.** Differential scanning calorimetry (DSC) analysis of conjugate PLGA-5

**Figure S9.** Differential scanning calorimetry (DSC) analysis of 1,8-naphthalimide 5

**Figure S10.** Calibration curve for dye 1 and dye 5 in water

**Figure S11.** Calibration curve for dye 3 for HPLC analysis

**Figure S12.** Calibration curve for dye 5 for HPLC analysis

**Figure S13.** Chromatogram of fluorescent polymer PLGA-3

**Figure S14.** Chromatogram of fluorescent polymer PLGA-5

**Figure S15.** Calculated absorption maxima for compound **1** plotted against the experimental wavelength

**Figure S16.** The experimental and TD-DFT/ESD calculated absorption and fluorescence spectra for dye 2

**Figure S17.** The experimental and TD-DFT/ESD calculated absorption and fluorescence spectra for dye 3

**Figure S18.** The experimental and TD-DFT/ESD calculated absorption and fluorescence spectra for dye 4

**Figure S19.** The experimental and TD-DFT/ESD calculated absorption and fluorescence spectra for dye 6

**Figure S20.** The experimental and TD-DFT/ESD calculated absorption and fluorescence spectra for dye 7

**Figure S21.** The experimental and TD-DFT/ESD calculated absorption and fluorescence spectra for dye 8

**Figure S22.** Absorption and fluorescence spectra of fluorophores 1-4 in CH<sub>2</sub>Cl<sub>2</sub>

**Figure S23.** Absorption and fluorescence spectra of fluorophores 1-4 in DMSO

**Figure S24.** Absorption and fluorescence spectra of fluorophores 1-4 in H<sub>2</sub>O

**Figure S25.** Absorption and fluorescence spectra of **fluorophores 5-8** in CH<sub>2</sub>Cl<sub>2</sub>.

**Figure S26.** Absorption and fluorescence spectra of fluorophores 5-8 in DMSO

**Figure S27.** Absorption and fluorescence spectra of fluorophores 5-8 in H<sub>2</sub>O

**Figure S28.** Wavelength dependence of extinction coefficient for fluorophores 1–4 in CH<sub>2</sub>Cl<sub>2</sub>

**Figure S29.** Wavelength dependence of extinction coefficient for fluorophores 1–4 in DMSO

**Figure S30.** Wavelength dependence of extinction coefficient for fluorophores 1–4 in H<sub>2</sub>O

**Figure S31.** Wavelength dependence of extinction coefficient for fluorophores 5-8 in CH<sub>2</sub>Cl<sub>2</sub>

**Figure S32.** Wavelength dependence of extinction coefficient for fluorophores 5-8 in DMSO

**Figure S33.** Wavelength dependence of extinction coefficient for fluorophores 5-8 in H<sub>2</sub>O

**Figure S34.** Absorption and fluorescence spectra for nanoparticles PLGA-fluorophore 1-4.

**Figure S35.** Absorption and fluorescence spectra for nanoparticles PLGA-fluorophore 5-8.

**Figure S36.** Absorption and fluorescence spectra of fluorophore 4, conjugate PLGA-4 and NPs

PLGA-4

**Figure S37.** Fluorescence intensity dependence of absorbance for Coumarin 6.

**Figure S38.** Fluorescence intensity dependence of absorbance for nanoparticles PLGA-1

**Figure S39.** Fluorescence intensity dependence of absorbance for nanoparticles PLGA-2

**Figure S40.** Fluorescence intensity dependence of absorbance for nanoparticles PLGA-3

**Figure S41.** Fluorescence intensity dependence of absorbance for nanoparticles PLGA-4

**Figure S42.** Fluorescence intensity dependence of absorbance for quinine sulfate

**Figure S43.** Fluorescence intensity dependence of absorbance for nanoparticles PLGA-5

**Figure S44.** Fluorescence intensity dependence of absorbance for nanoparticles PLGA-6

**Figure S45.** Fluorescence intensity dependence of absorbance for nanoparticles PLGA-7

**Figure S46.** Fluorescence intensity dependence of absorbance for nanoparticles PLGA-8

**Figure S47.** Stability of PLGA-4 and PLGA-8 nanoparticles in PBS media

**Figure S48.** Stability of PLGA-4 and PLGA-8 nanoparticles in RPMI-1640 media

**Figure S49.** Stability of PLGA-4 and PLGA-8 nanoparticles in DMEM media

**Figure S50.** Dependence of the relative average fluorescence intensity of PLGA-4 nanoparticles on time during incubation

**Figure S51.** Dependence of the relative average fluorescence intensity of PLGA-8 nanoparticles on time during incubation

**Figure S52.** Resazurin assay (Alamar Blue assay) for PLGA-5 nanoparticles

**Figure S53.** Time-dependent fluorescence intensity profiles of PLGA-5 and PLGA-Cy5 nanoparticles

**Figure S54.** Time-dependent fluorescence intensity profiles of DAPI and PLGA-4 nanoparticles and dye 4

**Table S1.** Table of spectral properties of fluorophores in free form, as part of PLGA nanoparticles and quantum dot (QD)-loaded PLGA nanostructure

**Table S2.** Degree of substitution in PLGA-1,8-naphthalimide conjugates determined by spectrofluorimetry

**Table S3.** Spectral properties of the obtained dyes and brightness of nanoparticles in comparison with the properties of common fluorescent markers

**Table S4.** Average lifetimes of excited states of fluorophores in free form and in nanoparticles

**Table S5.** Stability of PLGA-4 and PLGA-8 nanoparticles in PBS, RPMI-1640 and DMEM media

**Table S6.** Dependence of the average fluorescence intensity for nanoparticles made of PLGA-4 and PLGA-8 polymers in PBS, RPMI-1640 and DMEM media

**Table S1.** Comparative table of spectral properties of fluorophores in free form, as part of PLGA nanoparticles and quantum dot (QD)-loaded PLGA nanostructure

| Fluorophore                                | $\lambda^{abs}, nm$ | $\lambda^{fl}, nm$ | QY, % | $\frac{L}{\epsilon}, mol \times cm$ | QY in NP, %   | Medium               | Ref.    |
|--------------------------------------------|---------------------|--------------------|-------|-------------------------------------|---------------|----------------------|---------|
| Encapsulation of dye in PLGA nanoparticles |                     |                    |       |                                     |               |                      |         |
| Indocyanine green                          | 785                 | 815                | 2.7   | 262 100                             | 6.6           | PBS                  | [1]     |
| Rh 123                                     | 512                 | 531                | 90    | 85 200                              | 46.8          | EtOH                 | [2]     |
| DiI                                        | 549                 | 565                | 7.0   | 148 000                             | 14.91         | DDW/PBS              | [2]     |
| Coumarin 6                                 | 460                 | 500                | 78    | 54 000                              | 91.9          | Methanol             | [2]     |
| TPETPAFN                                   | 510                 | 750                | 52.5  | 91 600                              | 34            | Ethanol              | [3]     |
| Covalently modified PLGA nanoparticles     |                     |                    |       |                                     |               |                      |         |
| Cy3                                        | 548                 | 561                | 4     | 150 000                             | 73.34         | PBS                  | [4]     |
| Cy5                                        | 658                 | 677                | 40    | 250 000                             | 44.5          | Ethanol              | [2]     |
| Cy5.5                                      | 683                 | 703                | 27    | 250 000                             | 50            | H <sub>2</sub> O/PBS | [2]     |
| BODIPY FL                                  | 502                 | 511                | 90    | 80 000                              | 90            | MeOH                 | [5]     |
| DY-700                                     | 700                 | 725                | ~ 20  | 140 000                             | not specified | PBS                  | [6] [7] |
| Quantum Dot-Loaded PLGA nanoparticles      |                     |                    |       |                                     |               |                      |         |
| CdTe/CdSe                                  | 570                 | 760                | 52    | –                                   | 50            | Chloroform           | [8]     |
| CdSe/ZnS                                   | 405                 | 610                | ~26   | –                                   | ~42           | PBS                  | [9]     |
| TOPO-CdSe/ZnS                              | 475                 | 514                | 50    | –                                   | 50            | Ethanol              | [10]    |

1. Confirmation of the structure of PLGA-1,8-naphthalimide conjugates.

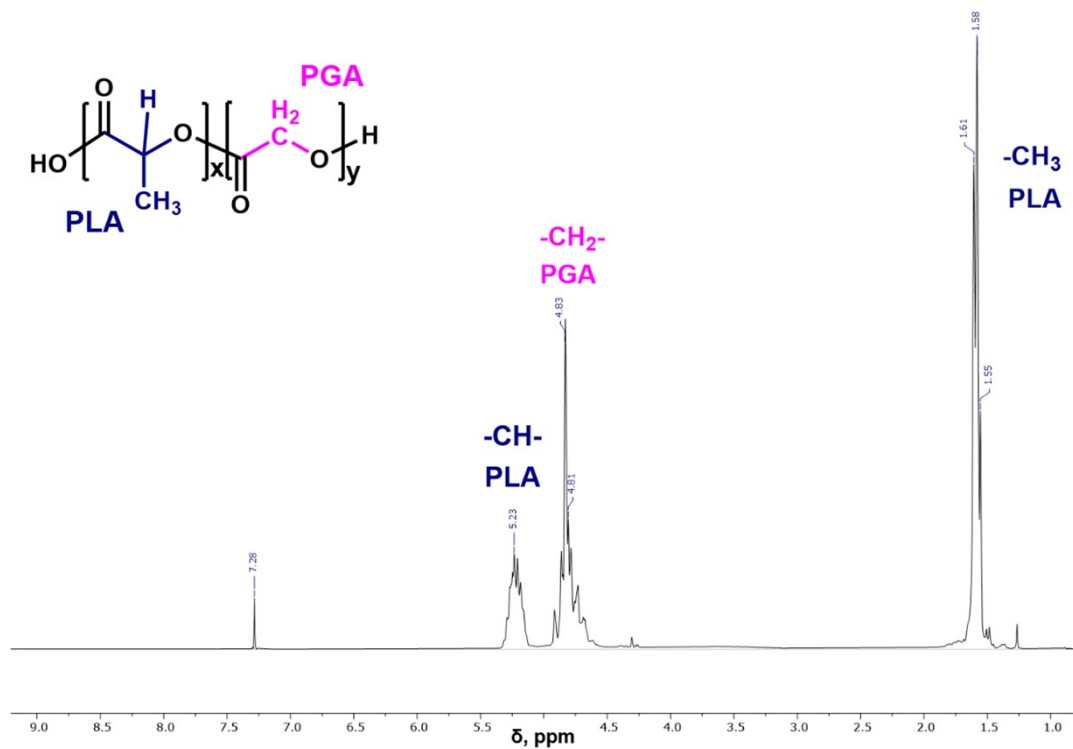

Figure S1. <sup>1</sup>H NMR spectrum of PLGA in CDCl<sub>3</sub>.

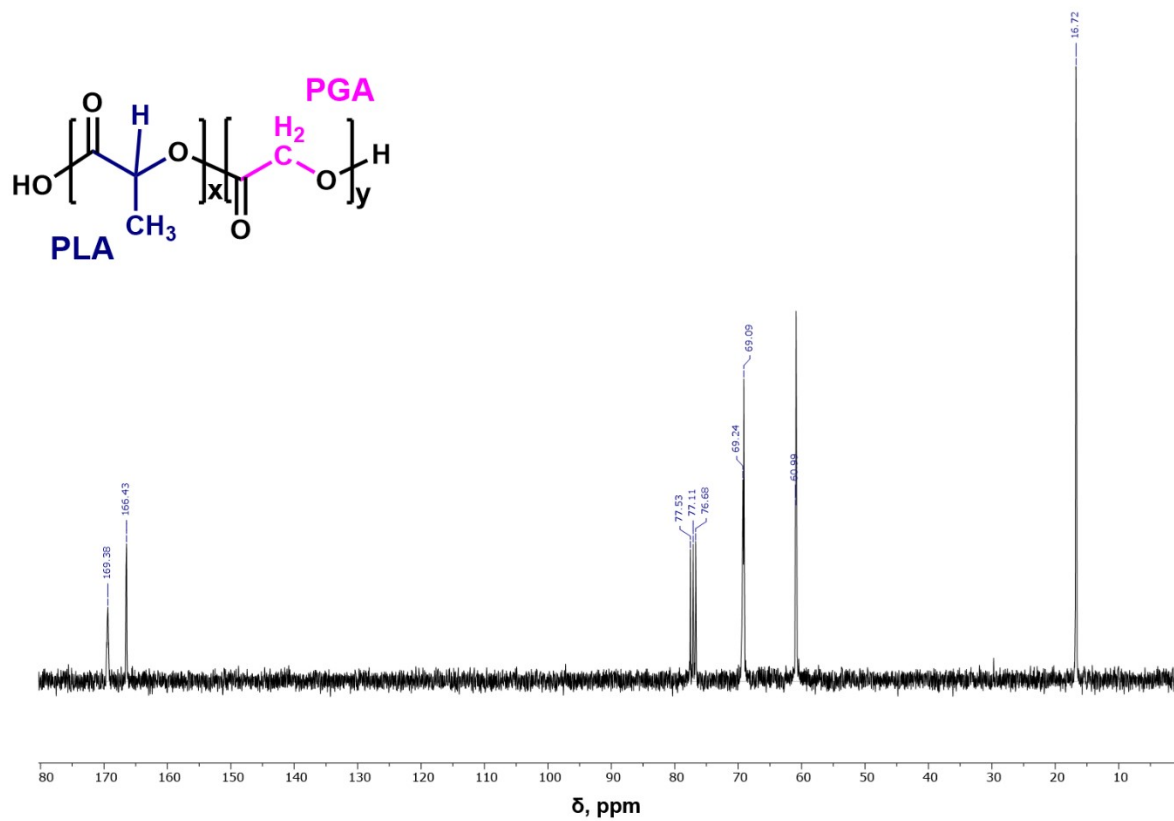

Figure S2. <sup>13</sup>C NMR spectrum of PLGA in CDCl<sub>3</sub>.

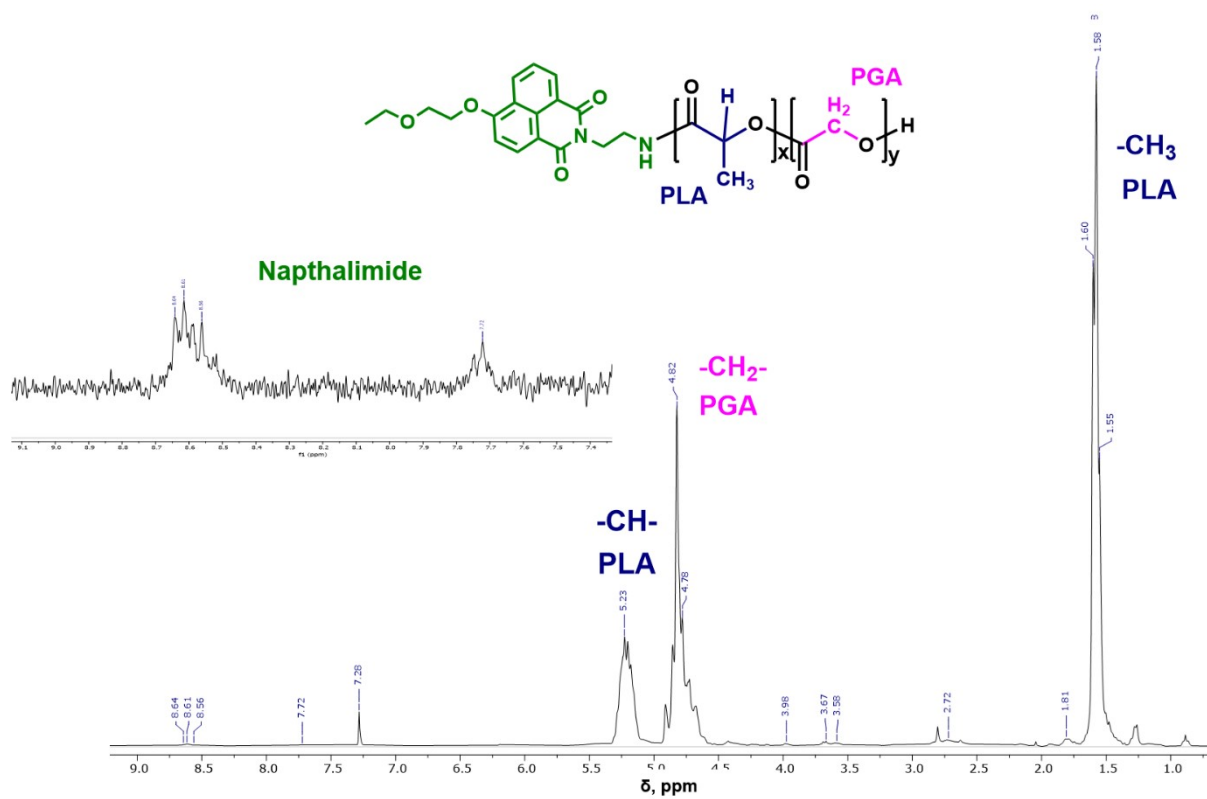

**Figure S3.** <sup>1</sup>H NMR spectrum of conjugate PLGA-5 in CDCl<sub>3</sub>.

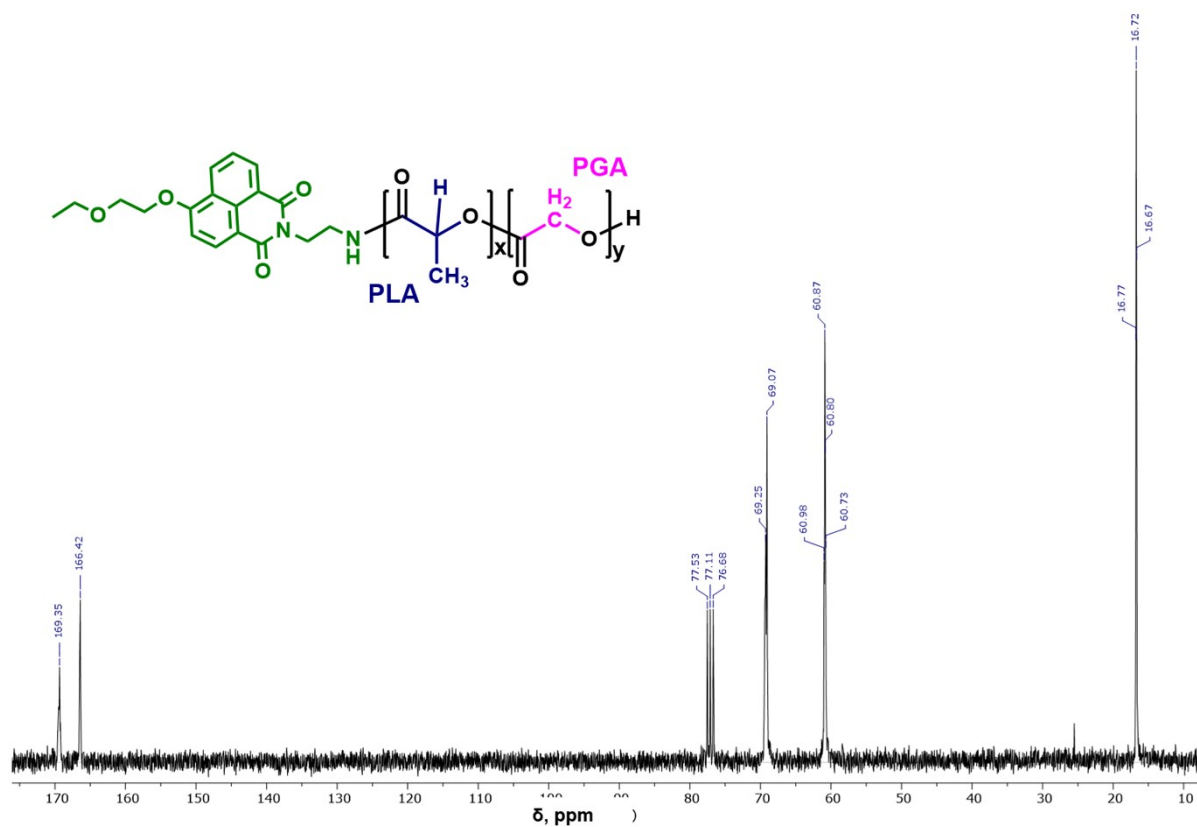

**Figure S4.** <sup>13</sup>C NMR spectrum of conjugate PLGA-5 in CDCl<sub>3</sub>.

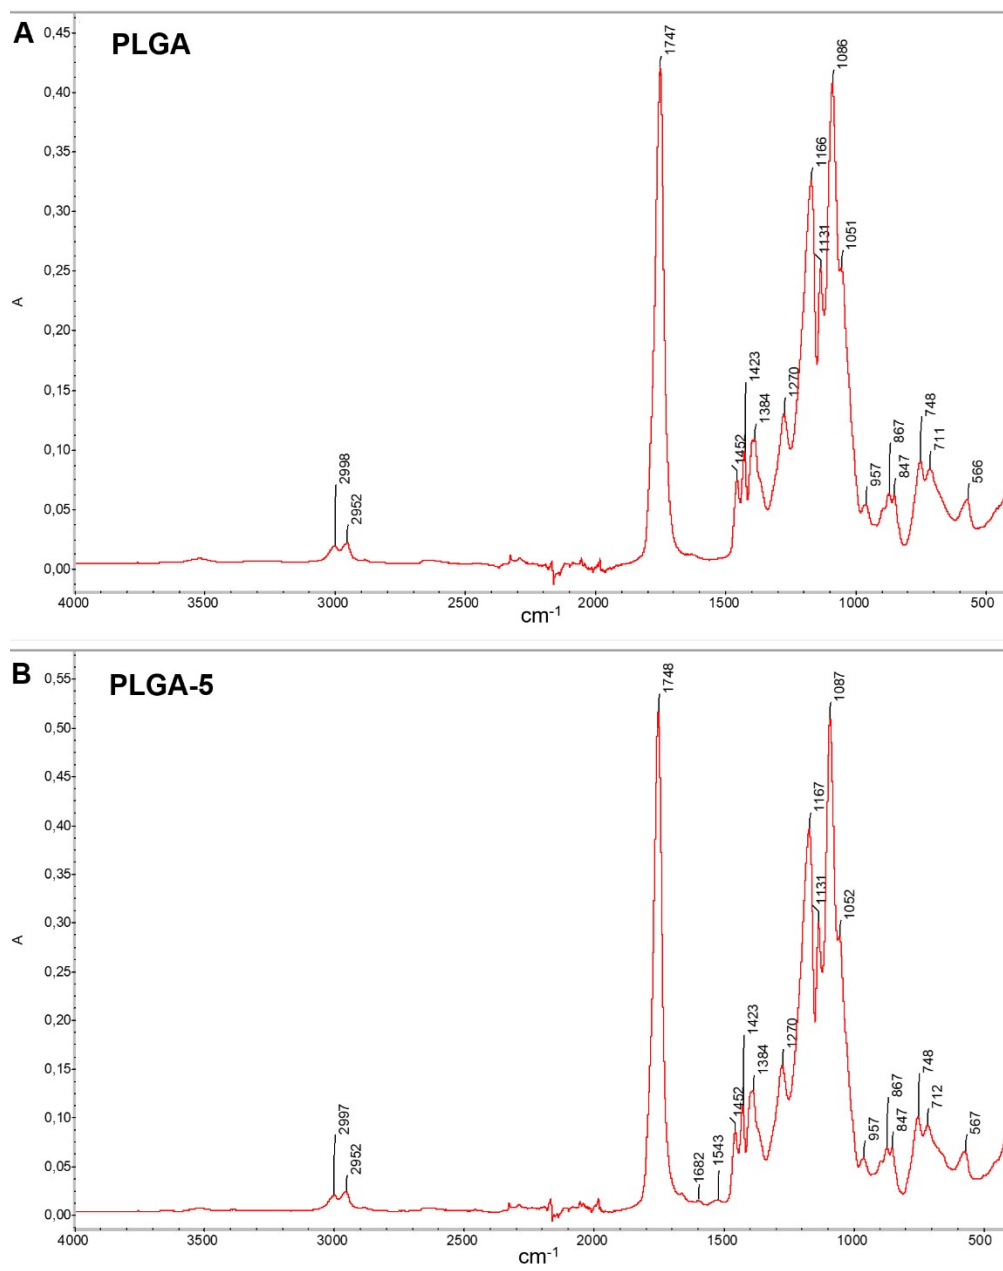

**Figure S5.** A) IR spectrum of unmodified PLGA; B) IR spectrum of the PLGA-5 conjugate.

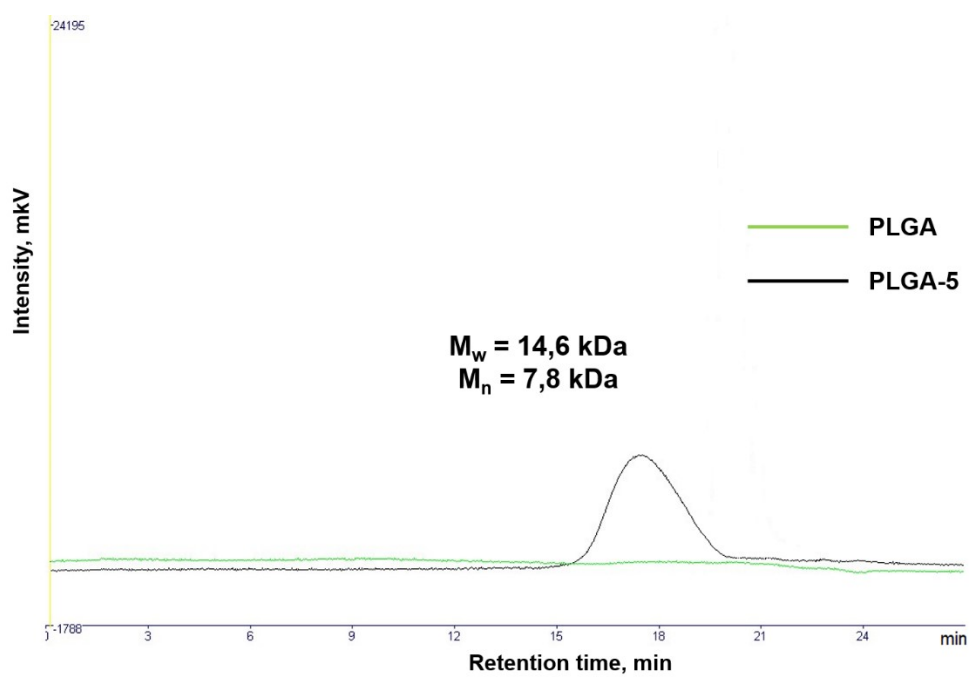

**Figure S6.** Gel-permeation chromatogram of PLGA-5 conjugate. Green – unmodified PLGA polymer. Black – modified PLGA-5 polymer. ( $M_w$ : mean molecular weight;  $M_n$ : number-average molecular weight).

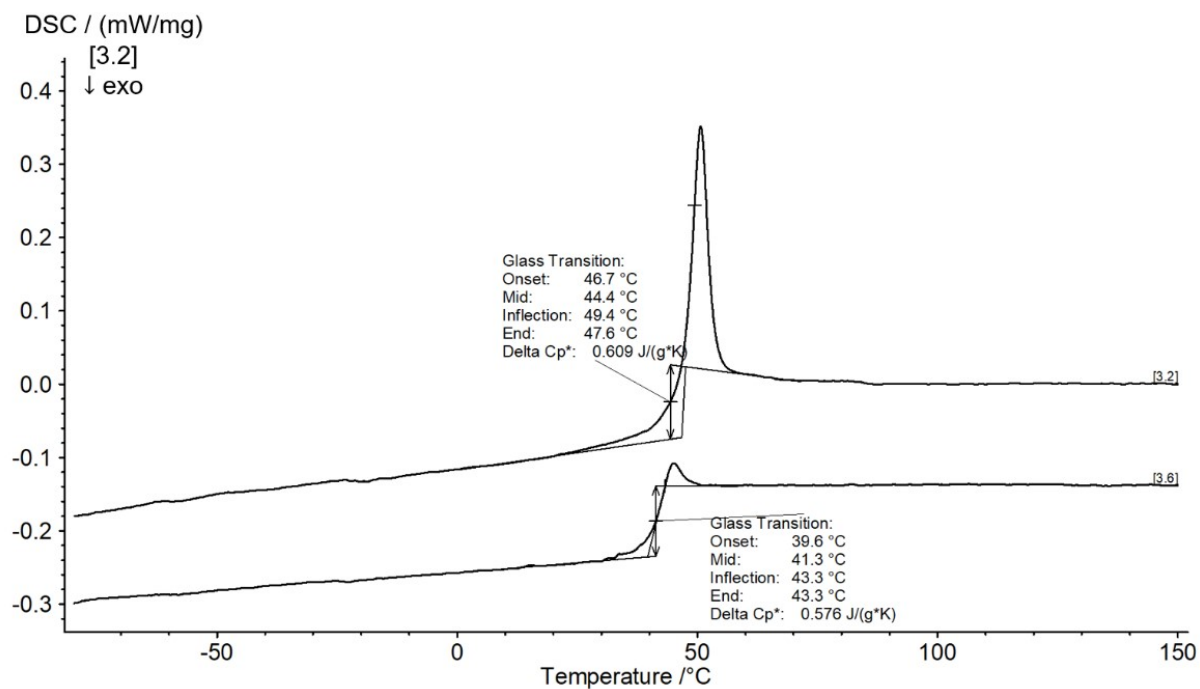

**Figure S7.** Differential scanning calorimetry (DSC) analysis of unmodified PLGA sample.

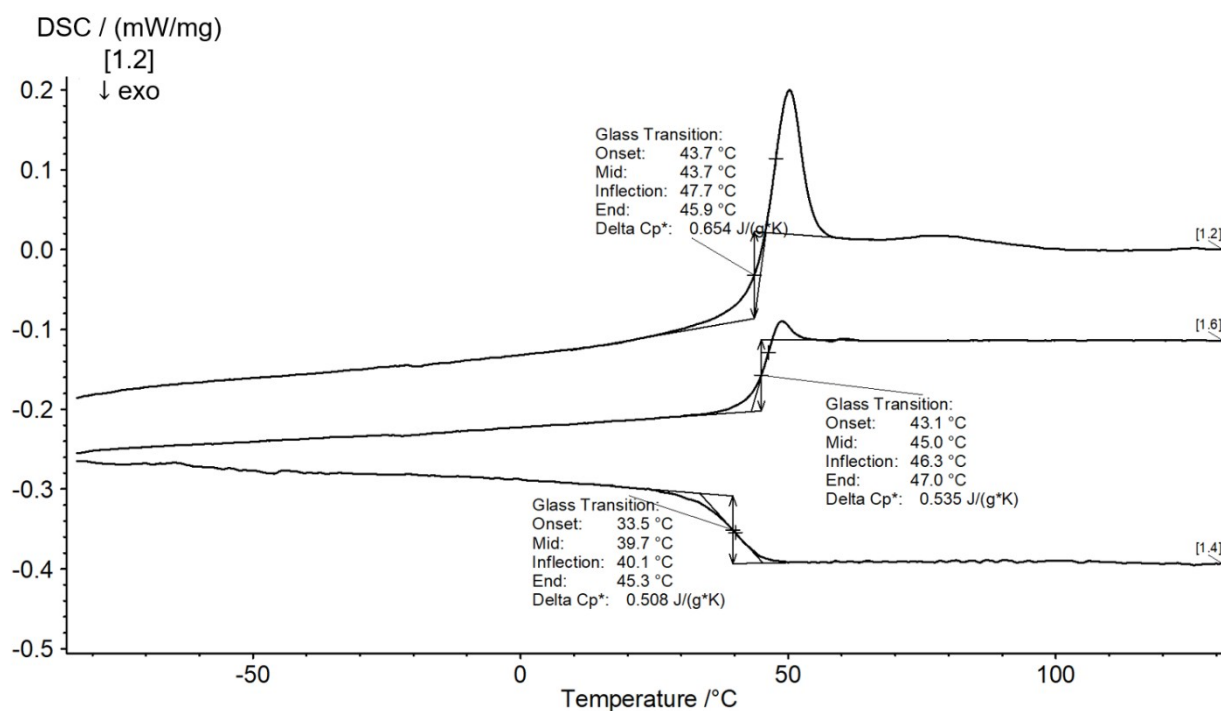

**Figure S8.** Differential scanning calorimetry (DSC) analysis of conjugate PLGA-5.

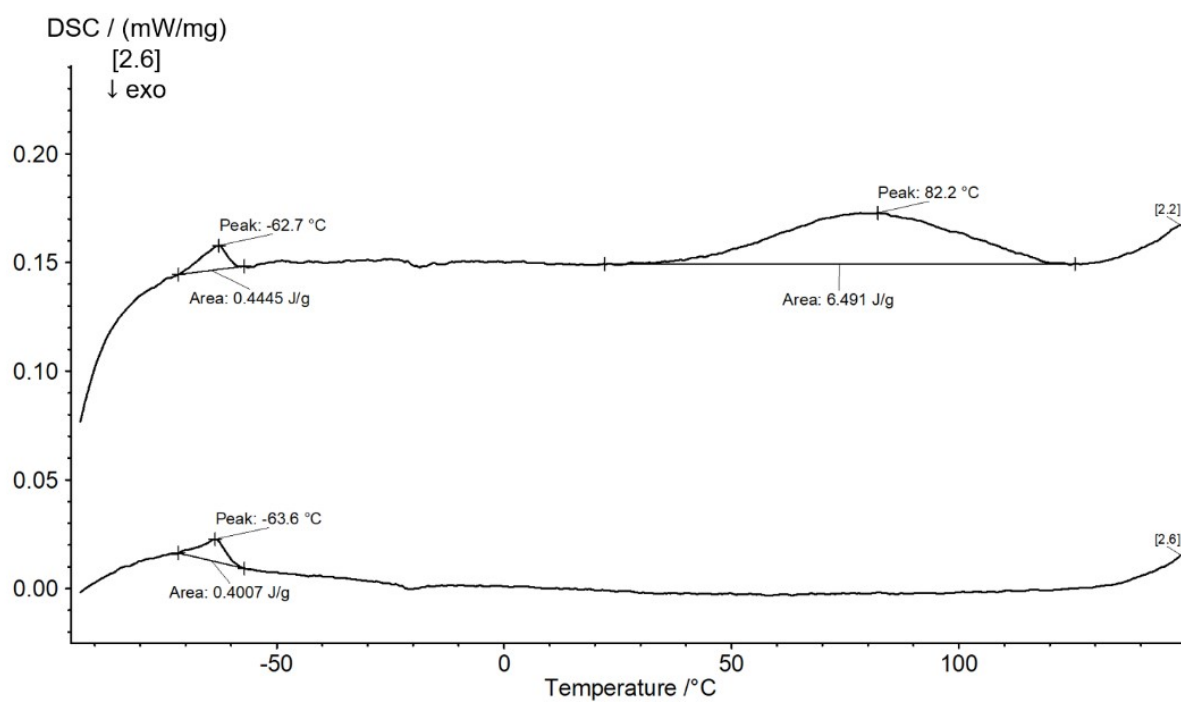

**Figure S9.** Differential scanning calorimetry (DSC) analysis of 1,8-naphthalimide 5.

1.1. Determination of the degree of substitution for PLGA-1,8-naphthalimide conjugates.

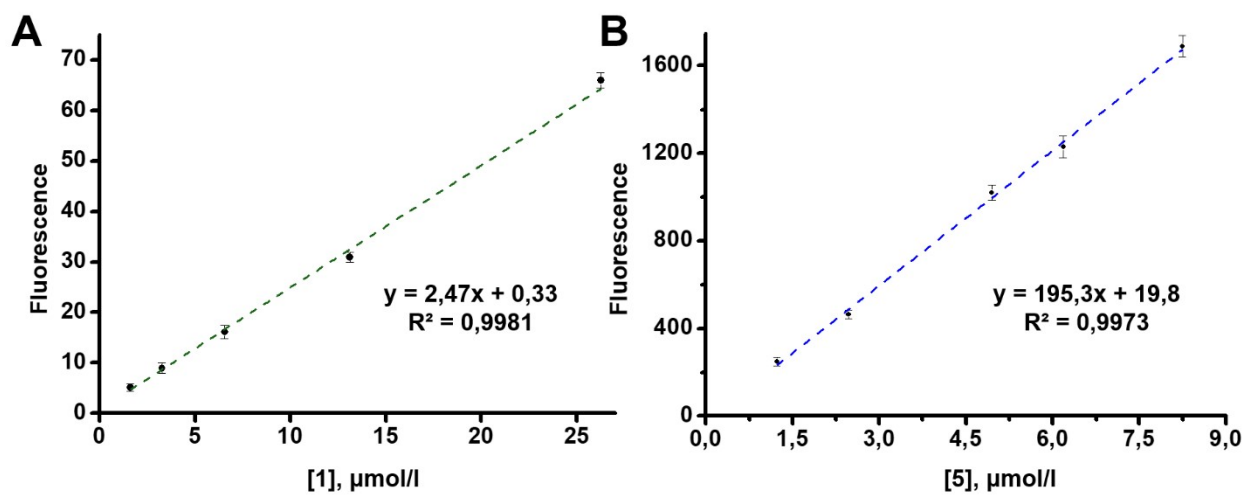

**Figure S10.** A) Calibration curve for dye **1** in water over the concentration range of 1.6 – 26.2 µmol/L in water.  $y = 2.47x + 0.33$ ,  $R^2 = 0.9981$ . B) Calibration curve for dye **5** in water over the concentration range of 1.2 - 12.4 µmol/L in water.  $y = 195.3x + 19.8$ ,  $R^2 = 0.9973$ .

**Table S2.** Degree of substitution in PLGA-1,8-naphthalimide conjugates determined by spectrofluorimetry

| PLGA-1,8-naphthalimide conjugate | Degree of substitution, % |
|----------------------------------|---------------------------|
| PLGA-1                           | 41                        |
| PLGA-2                           | 39                        |
| PLGA-3                           | 42                        |
| PLGA-4                           | 45                        |
| PLGA-5                           | 43                        |
| PLGA-6                           | 41                        |
| PLGA-7                           | 39                        |
| PLGA-8                           | 42                        |

## 1.2. Confirmation of the purity of PLGA-1,8-naphthalimide conjugates

In order to verify the purity of the polymers obtained and to conduct further studies on their optical properties, it was necessary to determine the content of residual free fluorophore in the modified PLGA-naphthalimide 1-8 conjugate. For this purpose, high-performance liquid chromatography was utilised. The study was conducted for two fluorescent polymers, PLGA-3 and PLGA-5, since free dyes and their conjugates dissolved excellently in acetonitrile. **Figure S11** and **Figure S12** illustrate two calibration curves for compounds **3** and **5**, which were utilised to ascertain the residual fluorophore content in the conjugate.

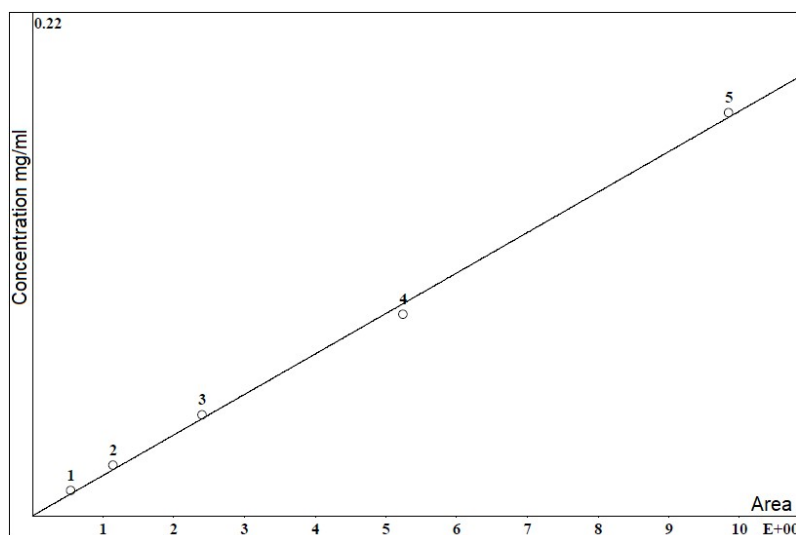

**Figure S11.** Calibration curve for dye **3** in the concentration range 0.0108–0.1720 mg/ml.  $Q = 0.03456 \times A$ ,  $R = 0.9991$ . Dye elution time – 9.04 min.

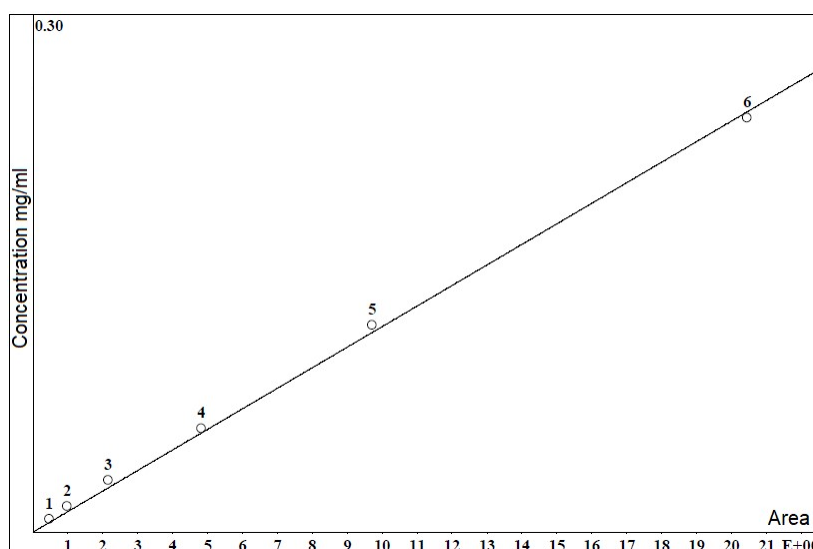

**Figure S12.** Calibration curve for dye **5** in the concentration range 0.0074–0.2360 mg/ml.  $Q = 0.0234 \times A$ ,  $R = 0.9998$ . Dye elution time – 9.17 min.

The following figure illustrates a general view of the chromatogram of dye **3** and PLGA-**3** polymer (see **Figure S13**). During the processing of the chromatogram, a very low-intensity peak of free dye **3** was identified, the concentration of which, calculated from the calibration curve, was 0.0012 mg/ml. Consequently, the percentage content of free fluorophore **3** in the polymer corresponds to 0.012 wt.%.

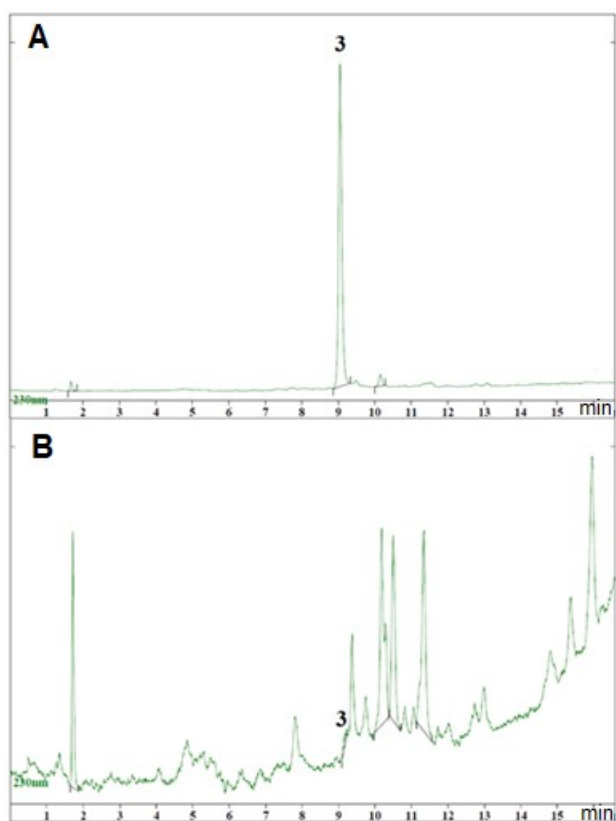

**Figure S13.** A) Chromatogram of dye **3** [**3**] = 0.086 mg/ml; B) Chromatogram of fluorescent polymer PLGA-**3**, [PLGA-**3**] = 10 mg/ml

A comparable study was conducted for dye **5** and PLGA-**5** polymer at a UV detector wavelength of 240 nm (see **Figure S14**). During the processing of the chromatogram, a peak of free dye **5** was identified, the concentration of which was calculated from the calibration curve to be 0.0013 mg/ml. Consequently, the fluorophore content in the polymer is 0.013 wt.%.

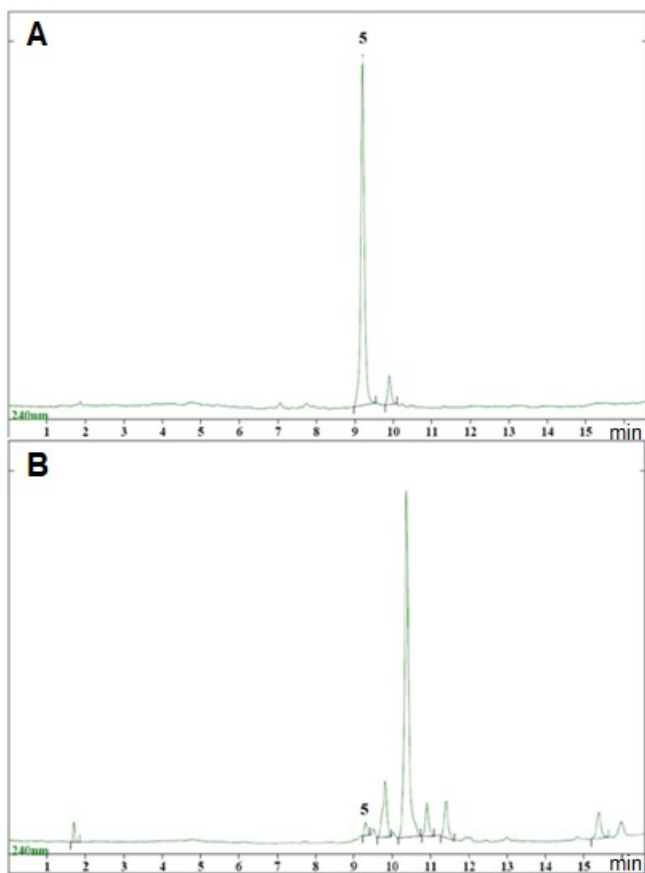

**Figure S14.** A) Chromatogram of dye **5**,  $[5] = 0.0295$  mg/ml; B) Chromatogram of fluorescent polymer PLGA-**5**,  $[PLGA-5] = 5.2$  mg/ml

## 2. DFT calculations

The convergence tolerances for the geometry optimization procedure were energy change =  $5.0 \times 10^{-6}$  Eh, maximal gradient =  $3.0 \times 10^{-4}$  Eh/Bohr, RMS gradient =  $1.0 \times 10^{-4}$  Eh/Bohr, maximal displacement =  $4.0 \times 10^{-3}$  Bohr, and RMS displacement =  $2.0 \times 10^{-3}$  Bohr.

The parameters for ESD module were chosen to be: spectral lineshape – Lorentzian, spectral range – 12500 to 25000  $\text{cm}^{-1}$  (400 to 800 nm), linewidth – 2500  $\text{cm}^{-1}$ , spectral resolution – 100.

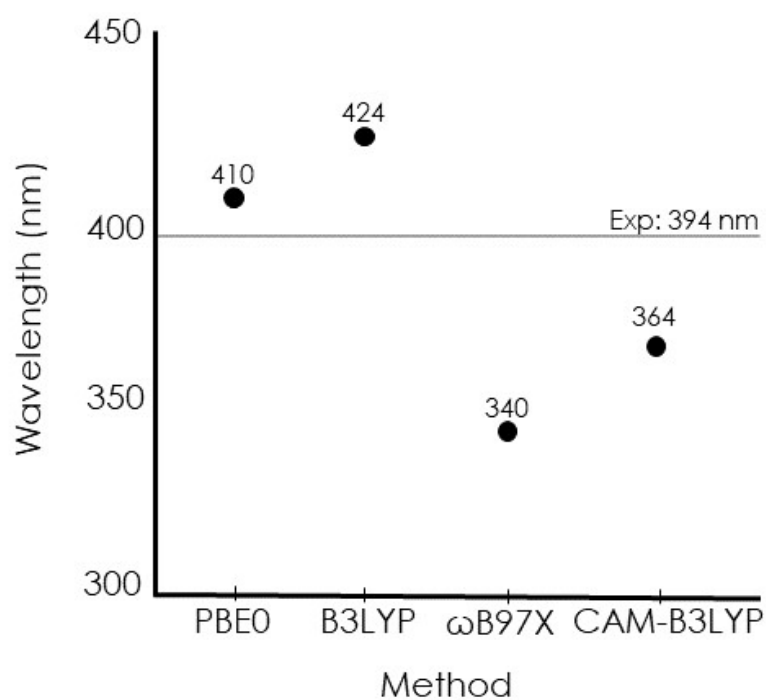

**Figure S15.** Calculated absorption maxima for compound **1** plotted against the experimental wavelength (gray horizontal line)

## 2.1. The experimental and TD-DFT/ESD calculated absorption and fluorescence spectra

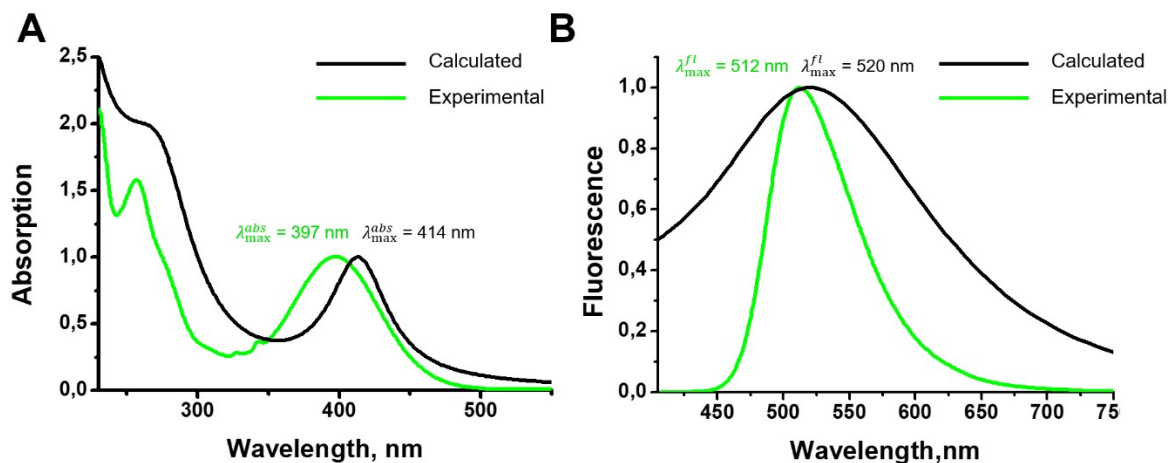

**Figure S16.** A) The experimental and TD-DFT calculated UV-Vis absorption spectra of the compound 2. B) The experimental and ESD calculated luminescence spectra of the compound 2

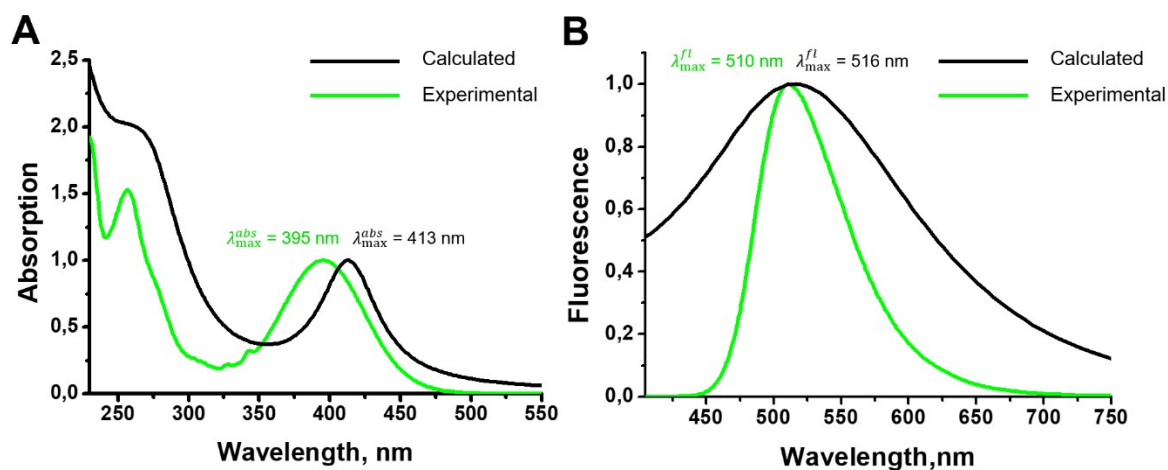

**Figure S17.** A) The experimental and TD-DFT calculated UV-Vis absorption spectra of the compound 3. B) The experimental and ESD calculated luminescence spectra of the compound 3

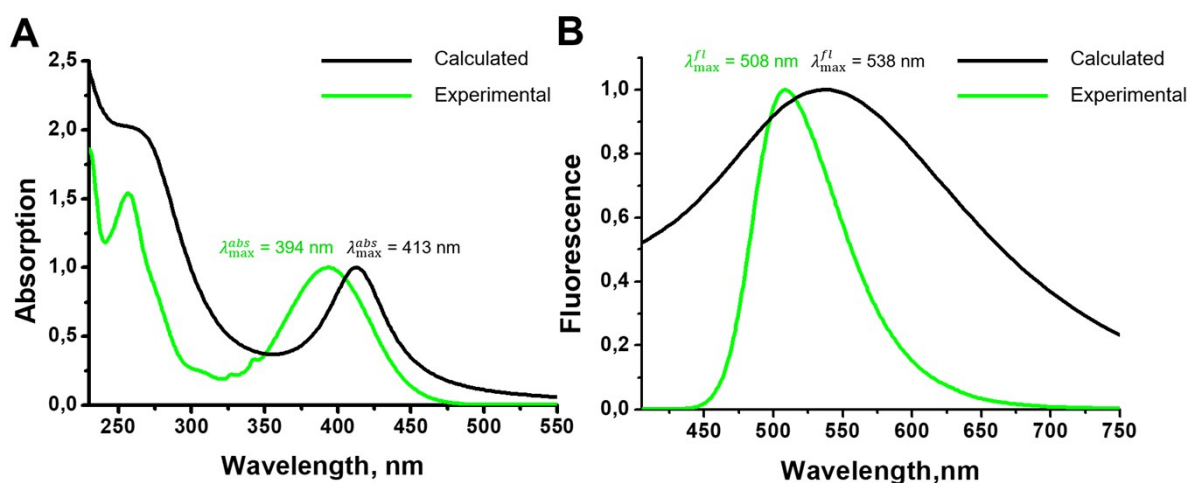

**Figure S18.** A) The experimental and TD-DFT calculated UV-Vis absorption spectra of the compound 4. B) The experimental and ESD calculated luminescence spectra of the compound 4

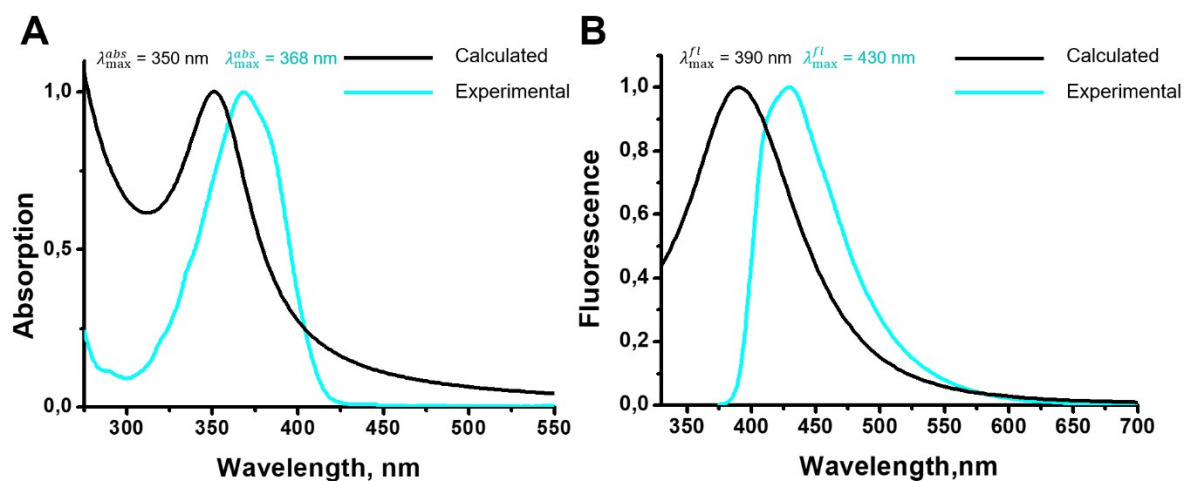

**Figure S19.** A) The experimental and TD-DFT calculated UV-Vis absorption spectra of the compound **6**. B) The experimental and ESD calculated luminescence spectra of the compound **6**

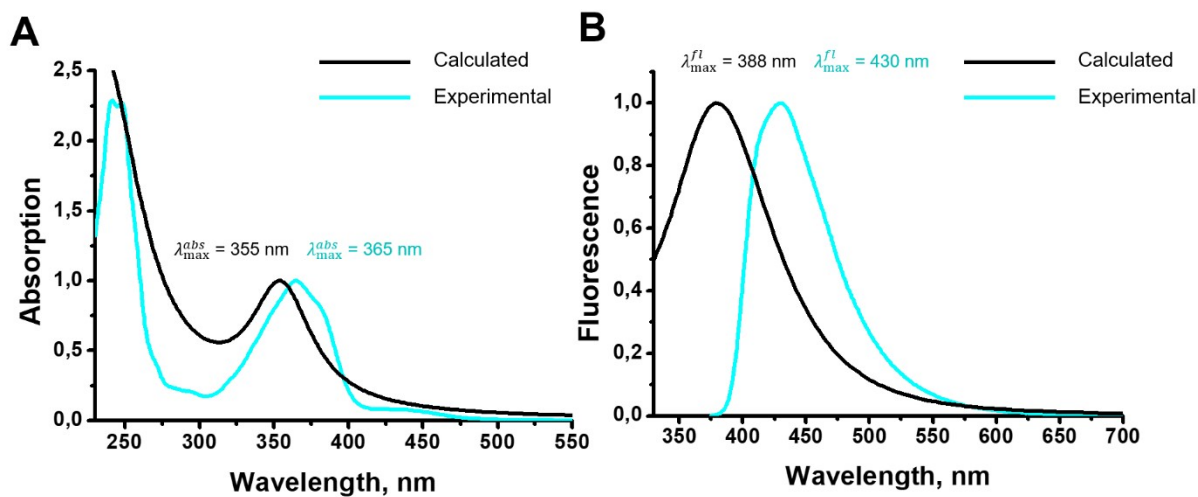

**Figure S20.** A) The experimental and TD-DFT calculated UV-Vis absorption spectra of the compound **7**. B) The experimental and ESD calculated luminescence spectra of the compound **7**

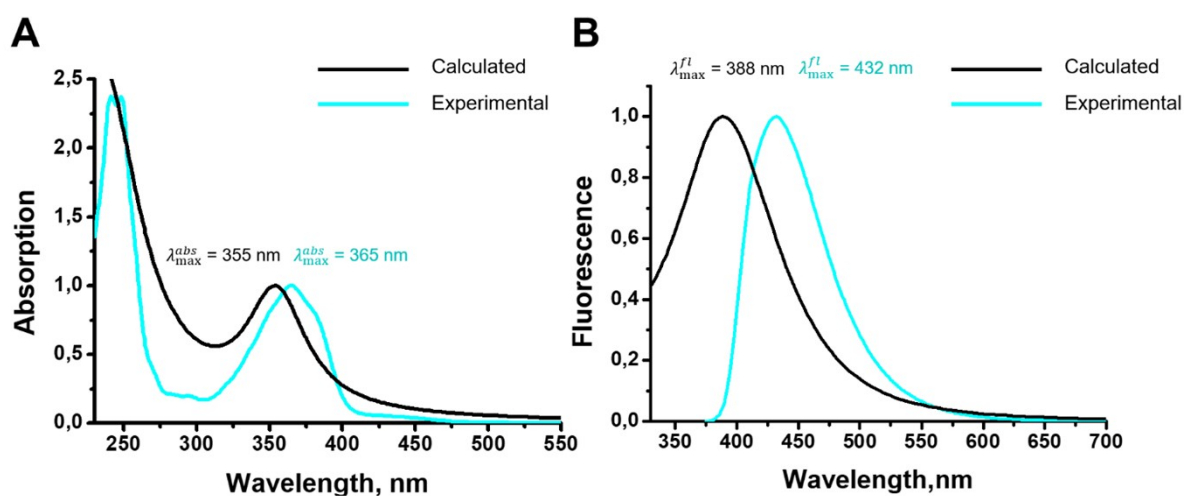

**Figure S21.** A) The experimental and TD-DFT calculated UV-Vis absorption spectra of the compound **8**. B) The experimental and ESD calculated luminescence spectra of the compound **8**

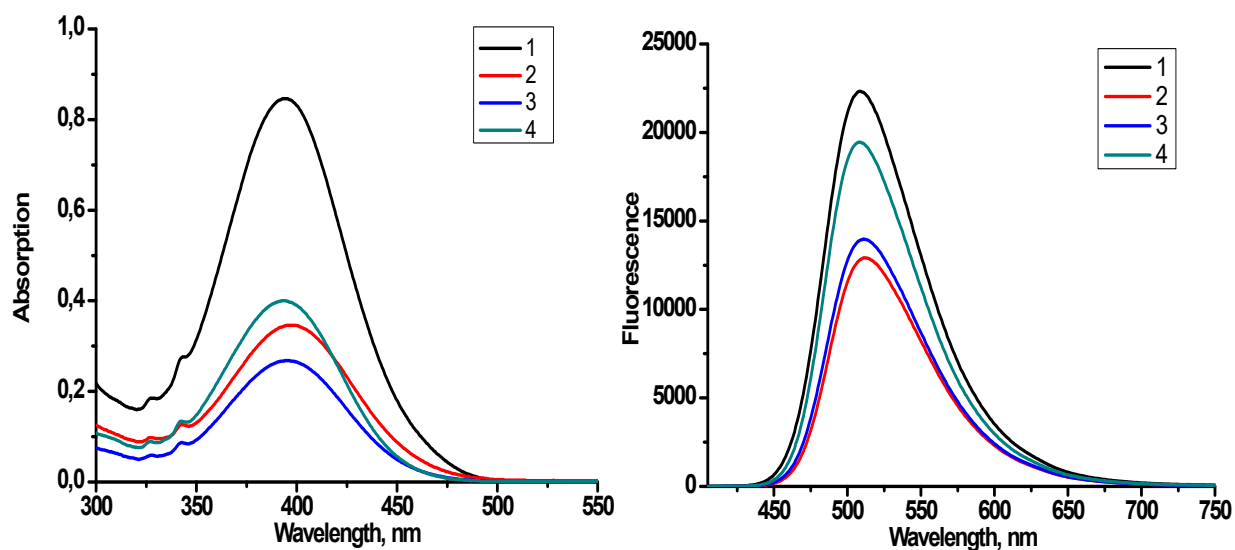

**Figure S22.** Absorption and fluorescence spectra of fluorophores 1-4 in  $\text{CH}_2\text{Cl}_2$ . Concentration of fluorophores 1-4 –  $1,2 \cdot 10^{-2}$  mg/ml

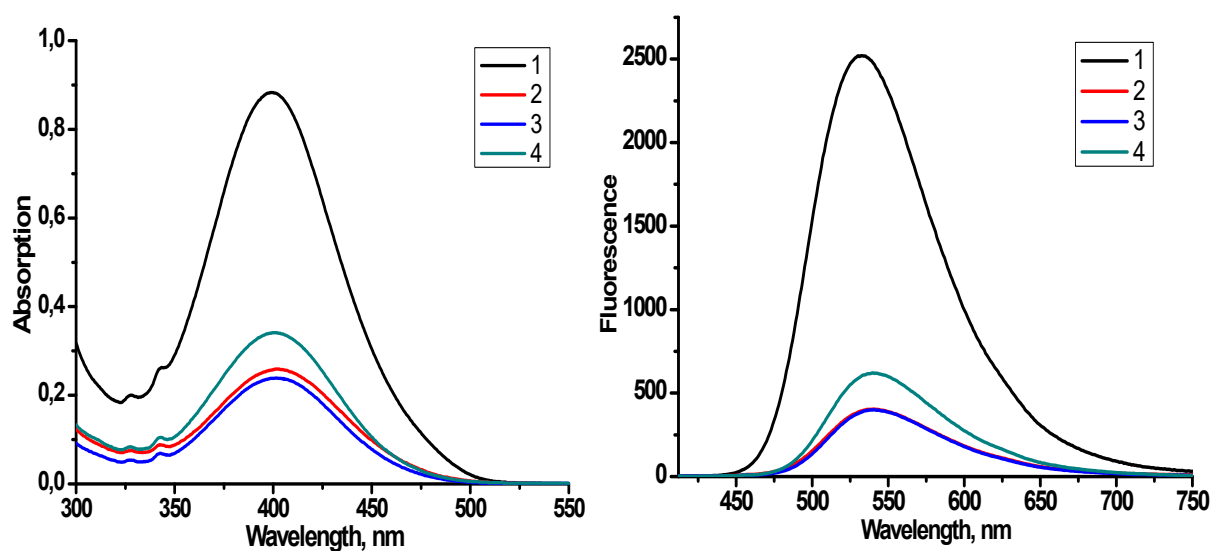

**Figure S23.** Absorption and fluorescence spectra of fluorophores 1-4 in DMSO. Concentration of fluorophores 1-4 –  $1,2 \cdot 10^{-2}$  mg/ml

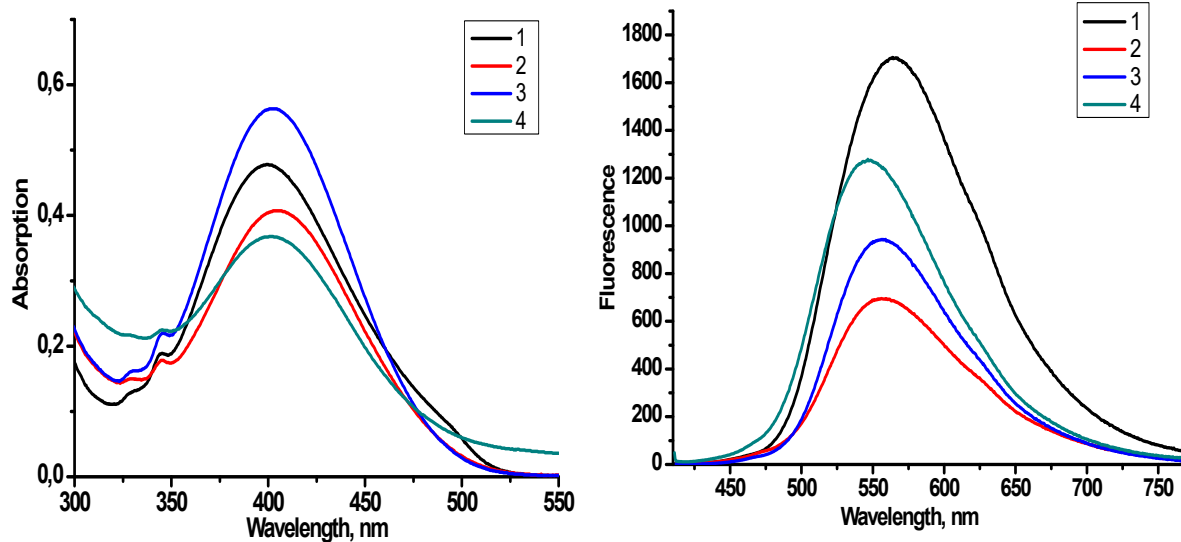

**Figure S24.** Absorption and fluorescence spectra of fluorophores **1-4** in H<sub>2</sub>O. Concentration of fluorophores **1-4** –  $1,2 \cdot 10^{-2}$  mg/ml

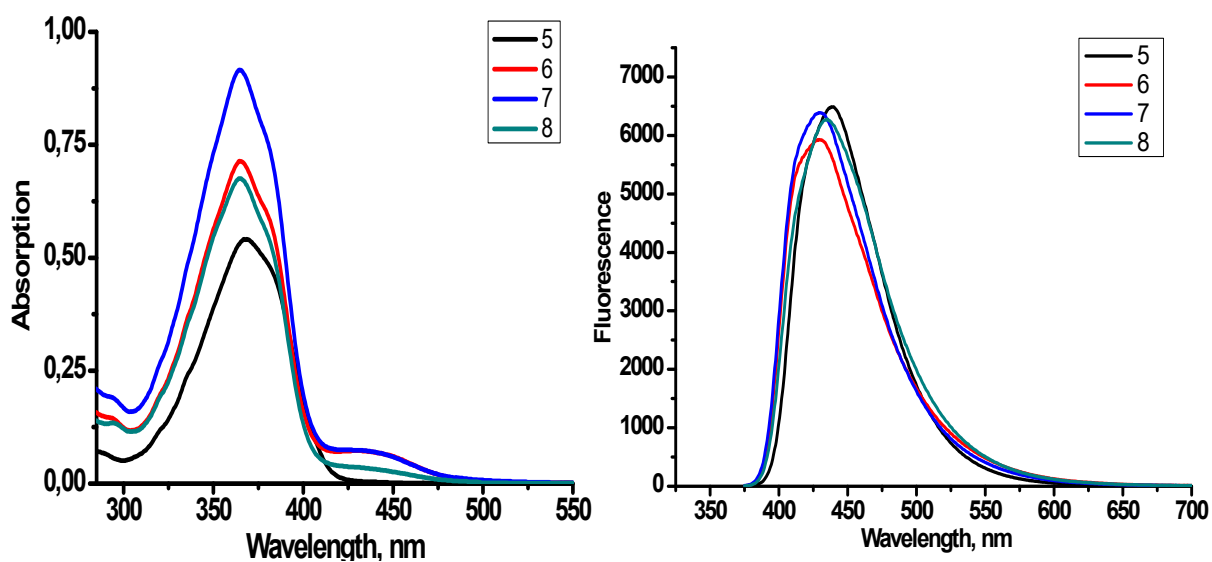

**Figure S25.** Absorption and fluorescence spectra of fluorophores **5-8** in CH<sub>2</sub>Cl<sub>2</sub>. Concentration of fluorophores **5-8** –  $1,2 \cdot 10^{-2}$  mg/ml

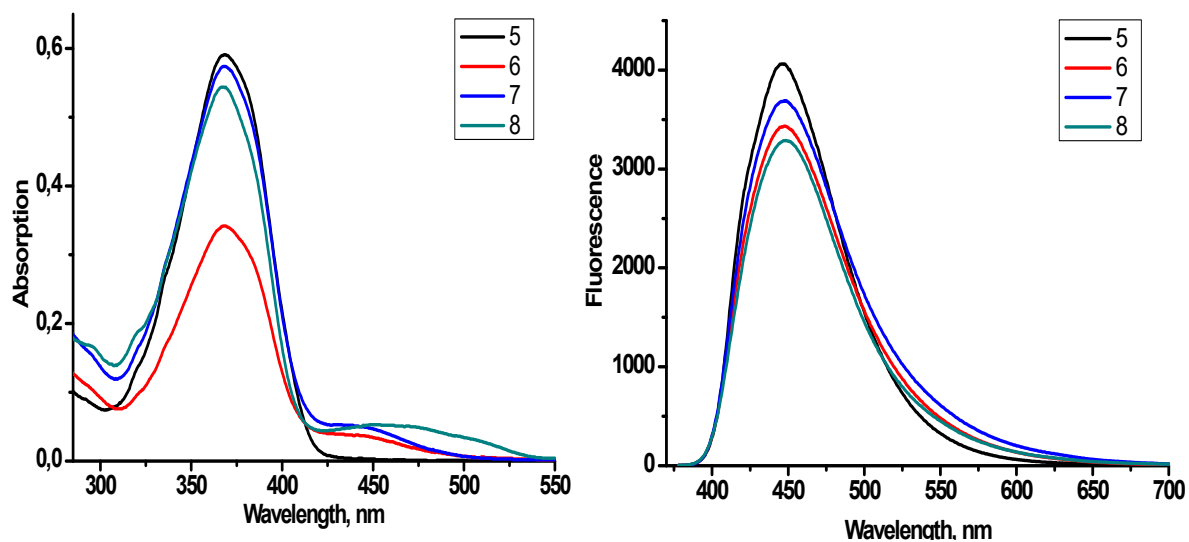

**Figure S26.** Absorption and fluorescence spectra of fluorophores **5-8** in DMSO. Concentration of fluorophores **5-8** –  $1,2 \cdot 10^{-2}$  mg/ml

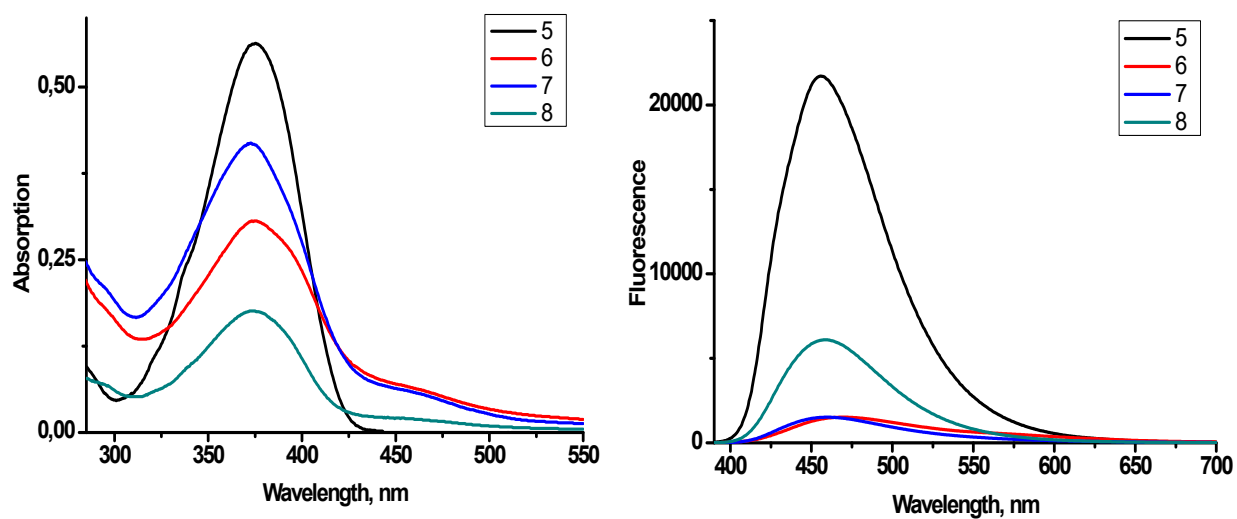

**Figure S27.** Absorption and fluorescence spectra of fluorophores **5-8** in H<sub>2</sub>O. Concentration of fluorophores **5-8** –  $1,2 \cdot 10^{-2}$  mg/ml

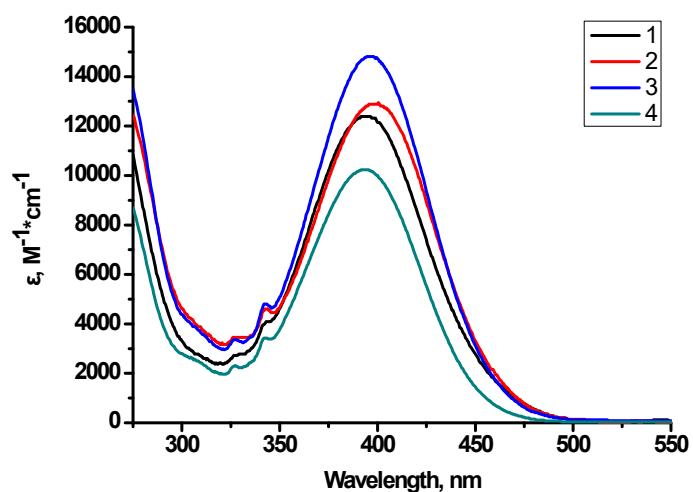

Figure S28. Wavelength dependence of extinction coefficient for fluorophores 1–4 in  $CH_2Cl_2$

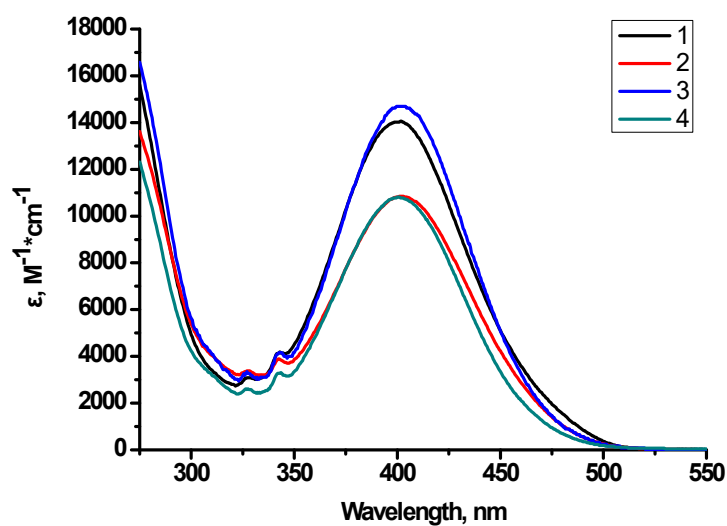

Figure S29. Wavelength dependence of extinction coefficient for fluorophores 1–4 in DMSO

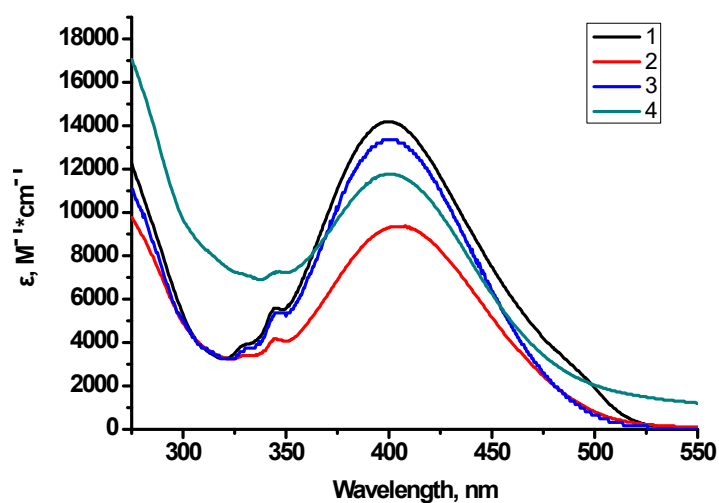

Figure S30. Wavelength dependence of extinction coefficient for fluorophores 1–4 in  $H_2O$

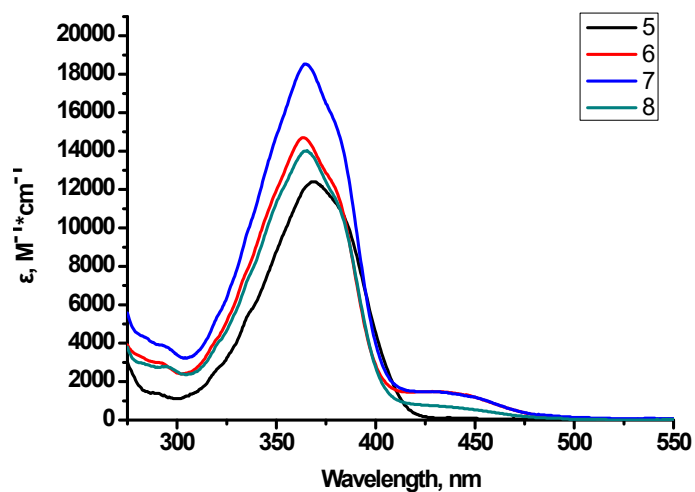

**Figure S31.** Wavelength dependence of extinction coefficient for fluorophores **5-8** in  $\text{CH}_2\text{Cl}_2$

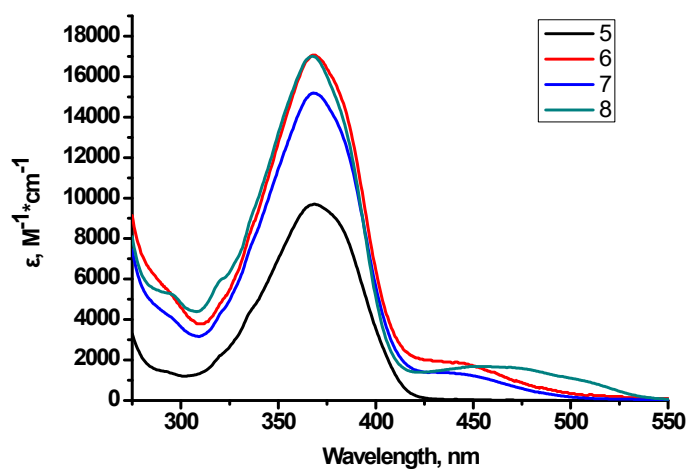

**Figure S32.** Wavelength dependence of extinction coefficient for fluorophores **5-8** in DMSO

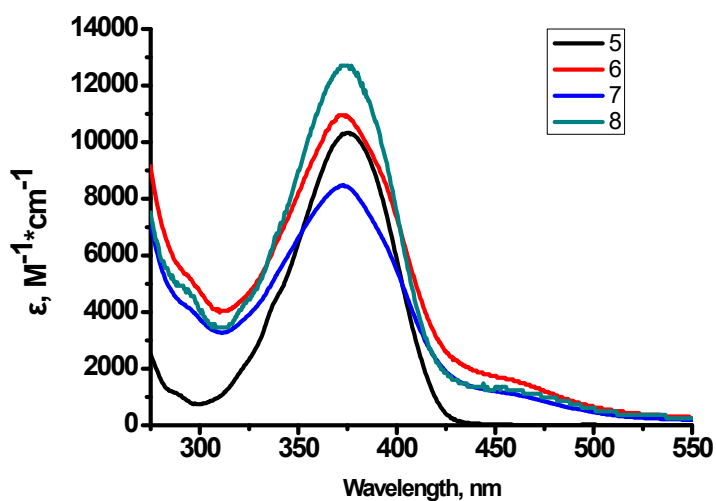

**Figure S33.** Wavelength dependence of extinction coefficient for fluorophores **5-8** in  $\text{H}_2\text{O}$

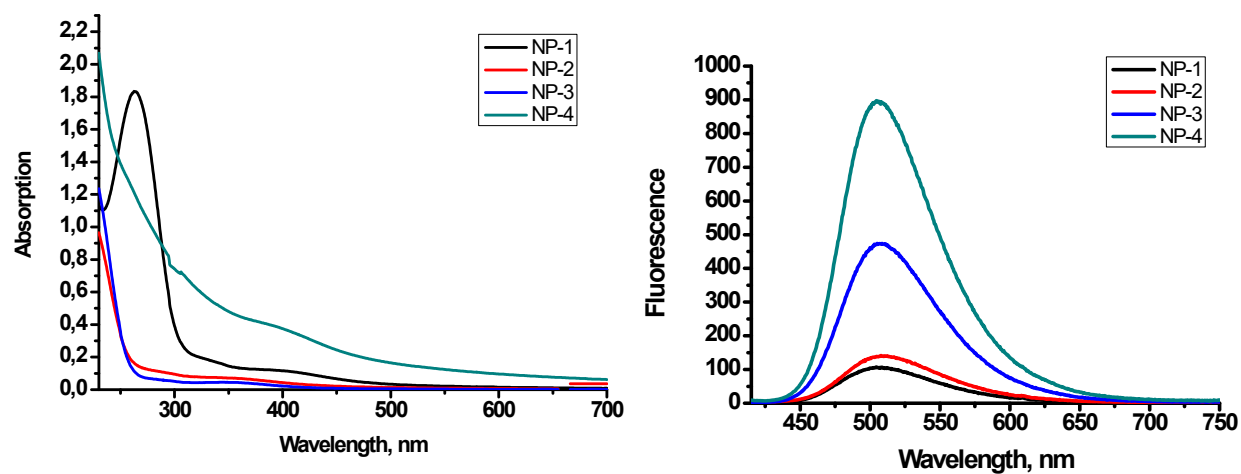

**Figure S34.** Absorption and fluorescence spectra for nanoparticles PLGA-fluorophore 1-4.

Concentration of NPs – 2,5 mg/ml

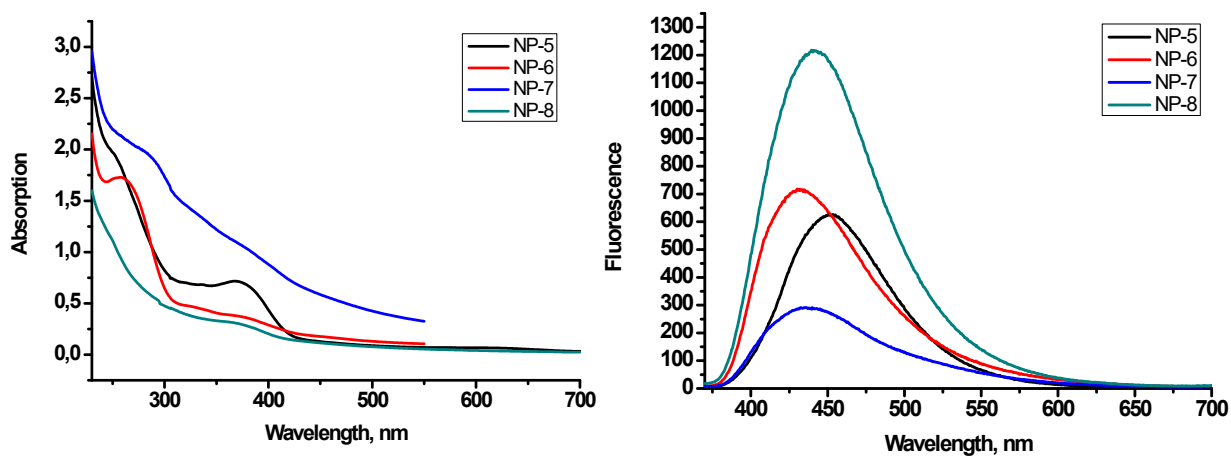

**Figure S35.** Absorption and fluorescence spectra for nanoparticles PLGA-fluorophore 5-8.

Concentration of NPs – 2,5 mg/ml

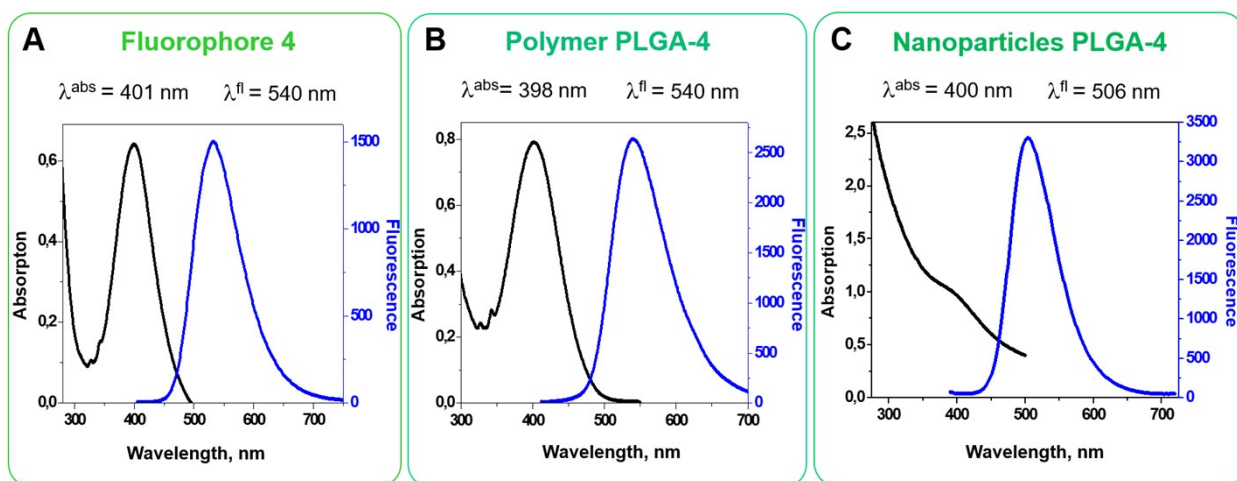

**Figure S36.** A – Absorption and fluorescence spectra of fluorophore 4 in DMSO, concentration [4] – 19.6 mg/ml. B – Absorption and fluorescence spectra of PLGA-4 polymer in DMSO, concentration [PLGA-4] – 12.0 mg/ml. C – Absorption and fluorescence spectra of PLGA-4 nanoparticles in water, concentration [PLGA-4] – 2.5 mg/ml.

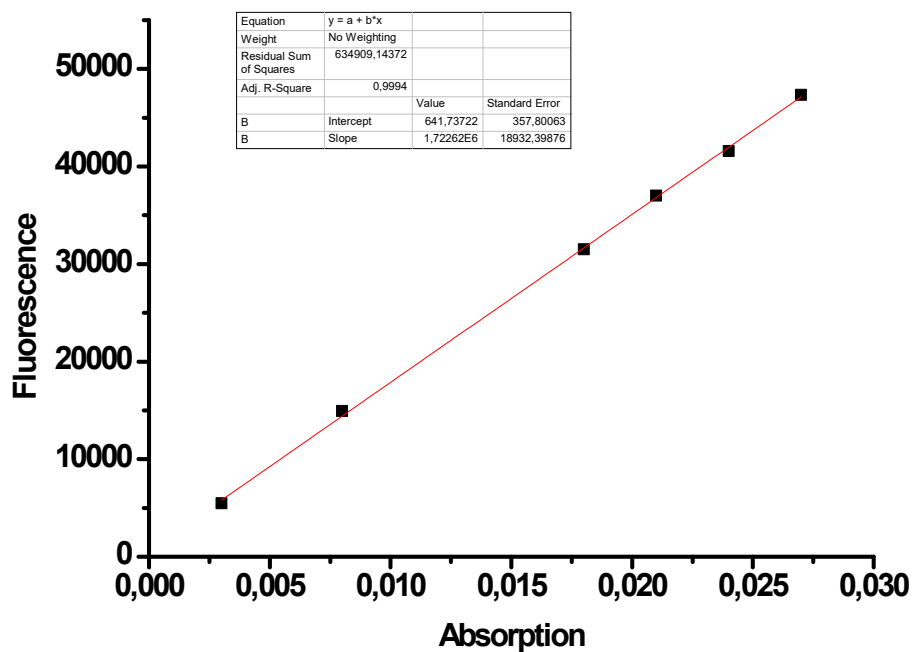

**Figure S37.** Fluorescence intensity dependence of absorbance for Coumarin 6.  $y = 1\,731\,025,7407x + 371,8702$ ,  $R^2 = 0,9994$

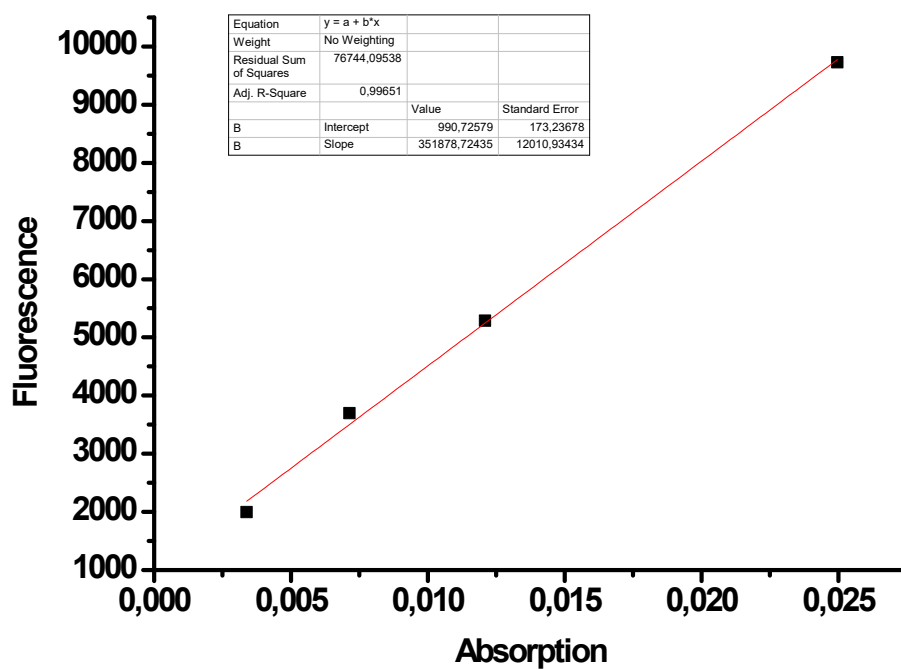

**Figure S38.** Fluorescence intensity dependence of absorbance for nanoparticles PLGA-1.  $y = 351\,878,7244x + 990,7258$ ,  $R^2 = 0,9997$

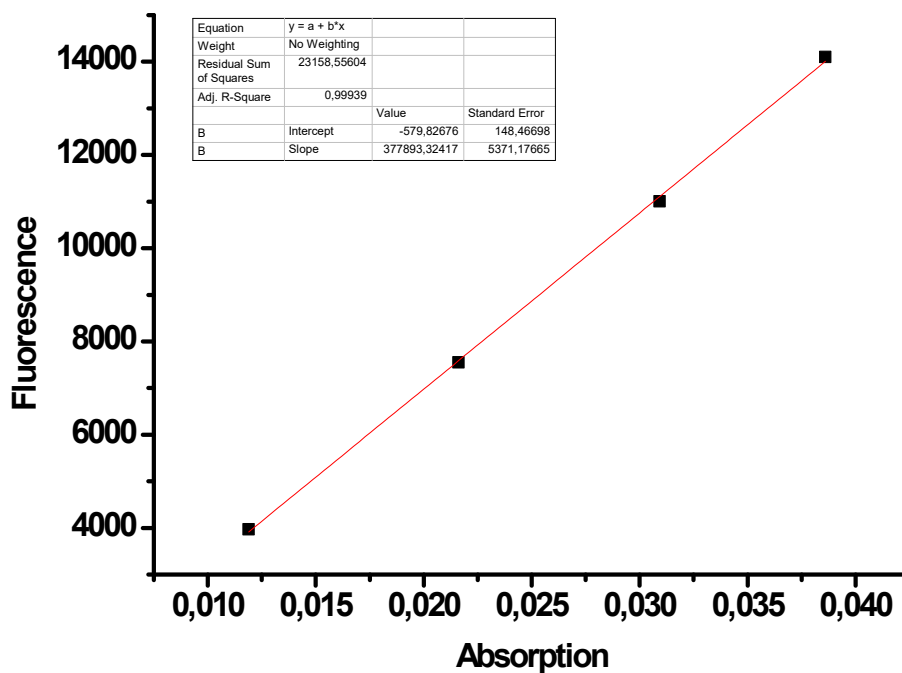

**Figure S39.** Fluorescence intensity dependence of absorbance for nanoparticles PLGA-2.

$$y = 377893x - 579,83, R^2 = 0,9994$$

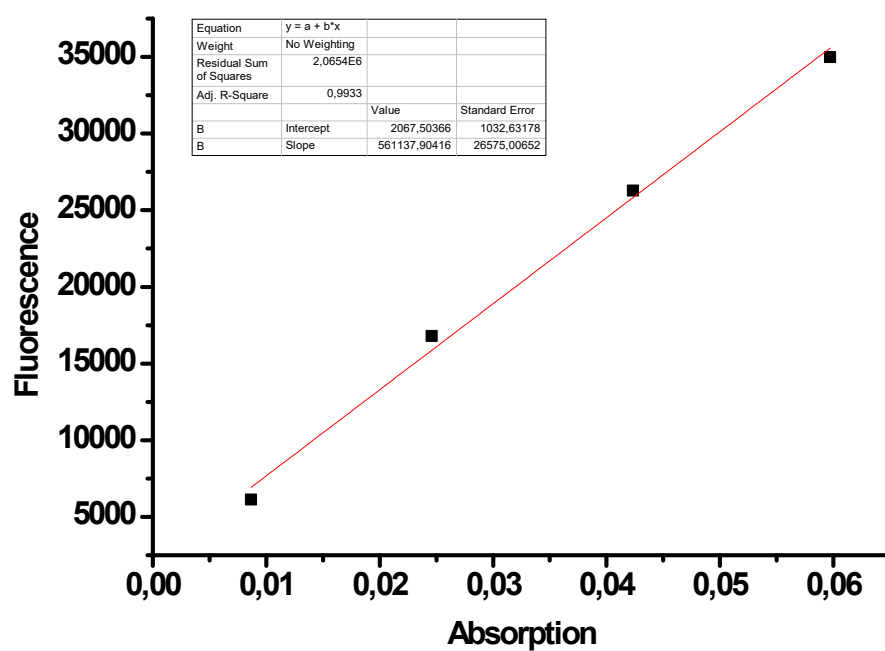

**Figure S40.** Fluorescence intensity dependence of absorbance for nanoparticles PLGA-3.

$$y = 561138x + 2067,5, R^2 = 0,9933$$

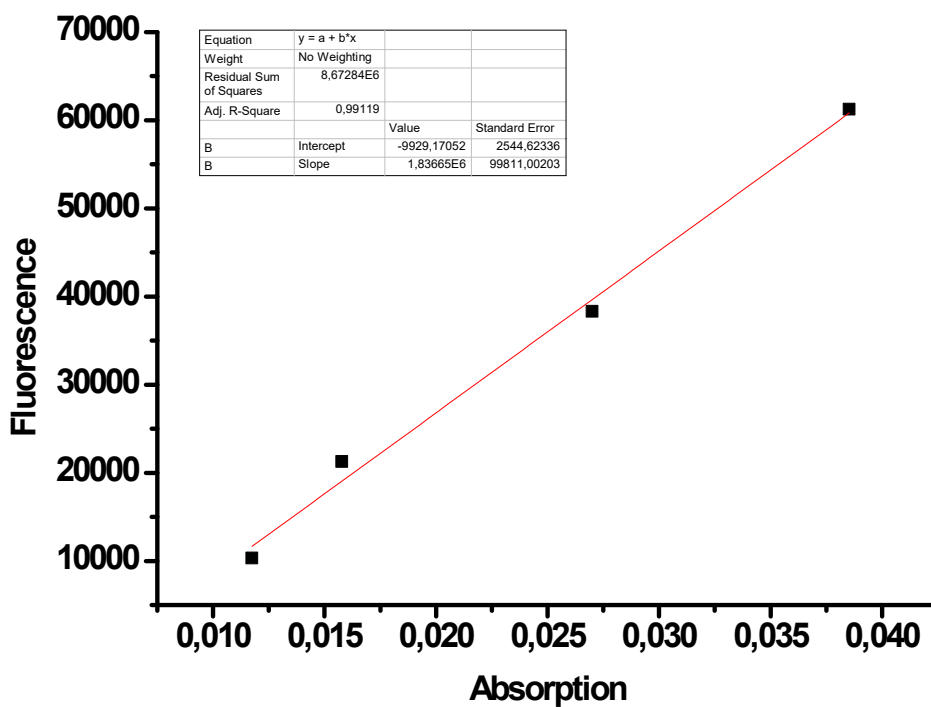

**Figure S41.** Fluorescence intensity dependence of absorbance for nanoparticles PLGA-4.  
 $y = 1\,836\,650,1484x - 9\,929,1696$ ,  $R^2 = 0,9912$

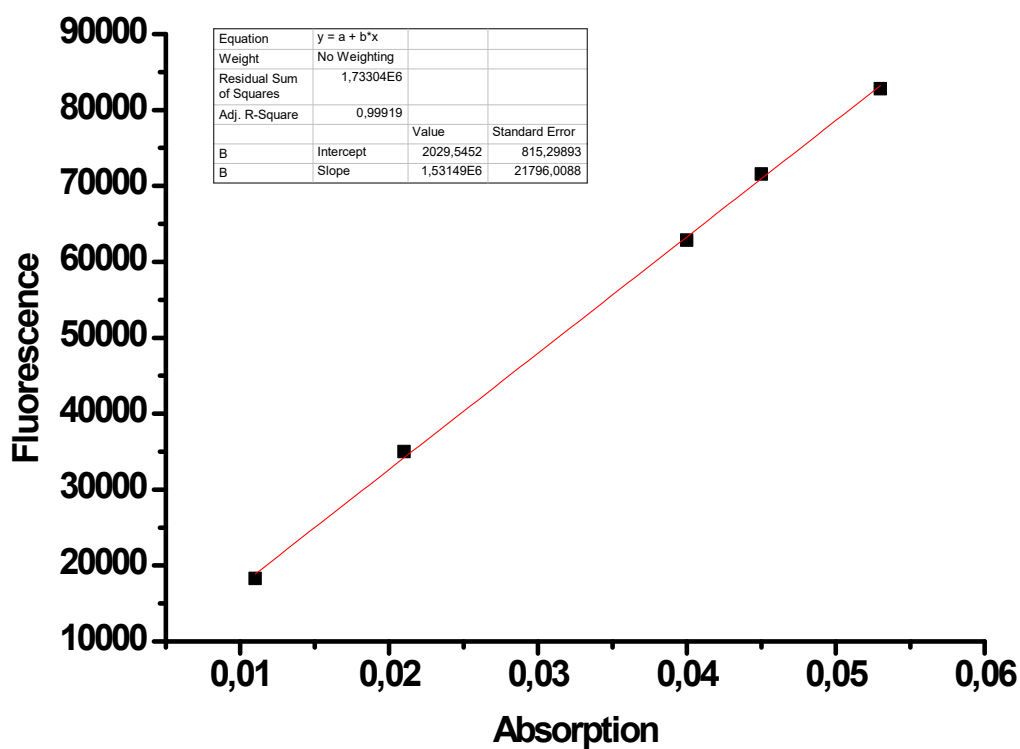

**Figure S42.** Fluorescence intensity dependence of absorbance for quinine sulfate.  
 $y = 1\,547\,545,9646x + 1\,720,4130$ ,  $R^2 = 0,9992$

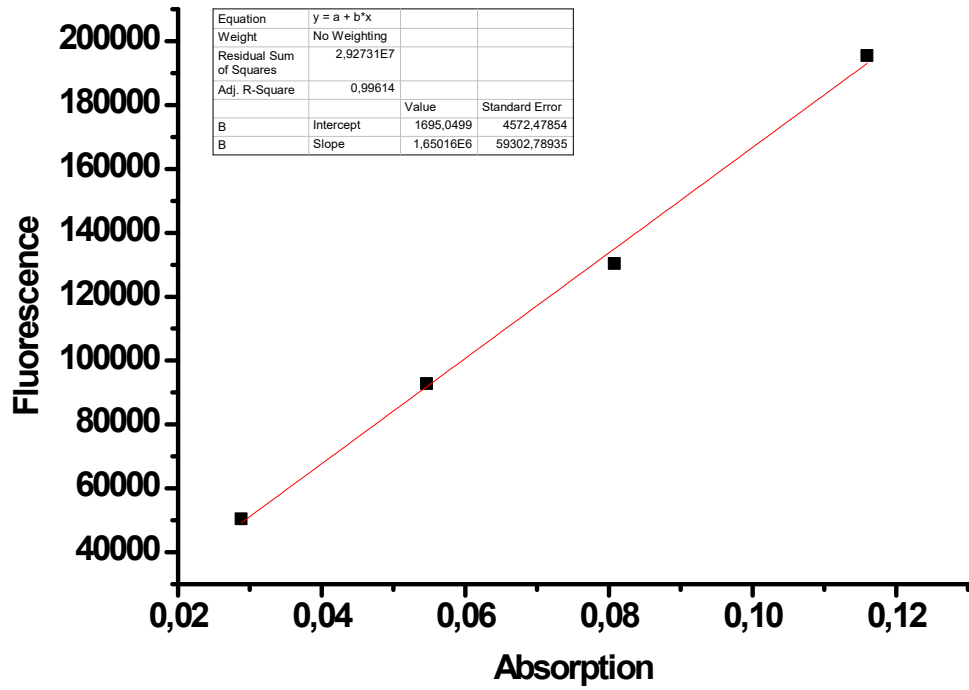

**Figure S43.** Fluorescence intensity dependence of absorbance for nanoparticles PLGA-5.  
 $y = 1\,650\,162,7829x + 1\,695,0499$ ,  $R^2 = 0,9961$

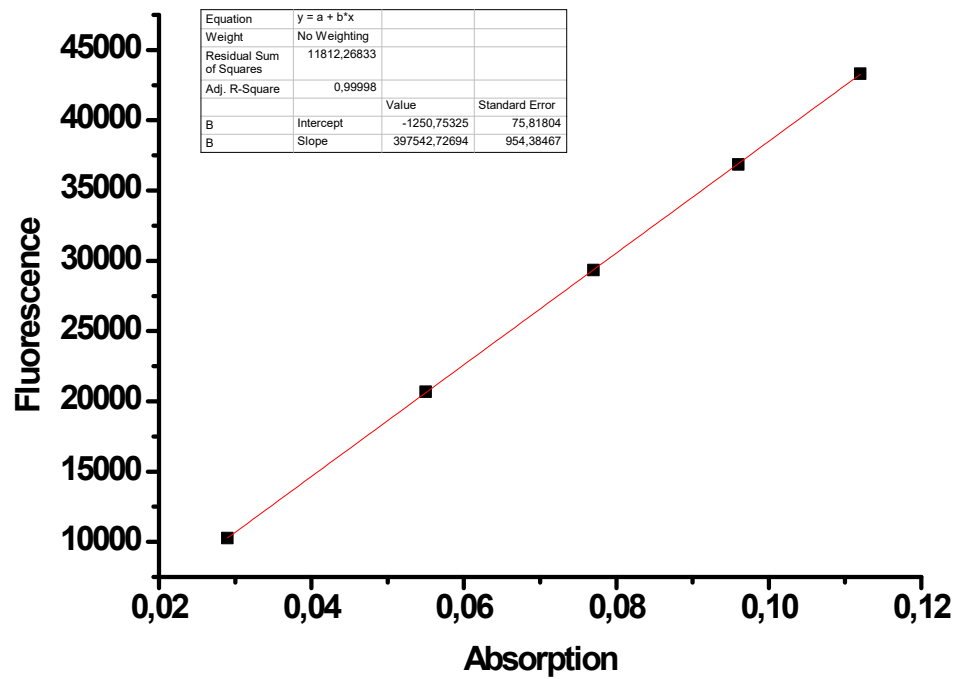

**Figure S44.** Fluorescence intensity dependence of absorbance for nanoparticles PLGA-6.  
 $y = 397\,542,7269x - 1\,250,7532$ ,  $R^2 = 1,0000$

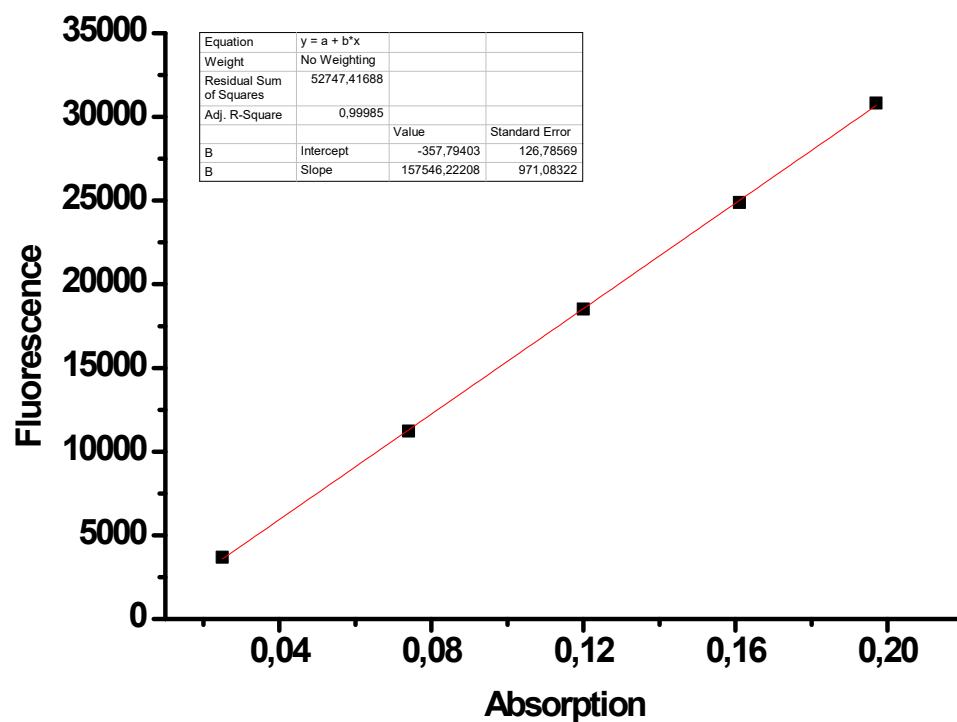

**Figure S45.** Fluorescence intensity dependence of absorbance for nanoparticles PLGA-7.  
 $y = 157546x - 357,79$ ,  $R^2 = 0,9999$

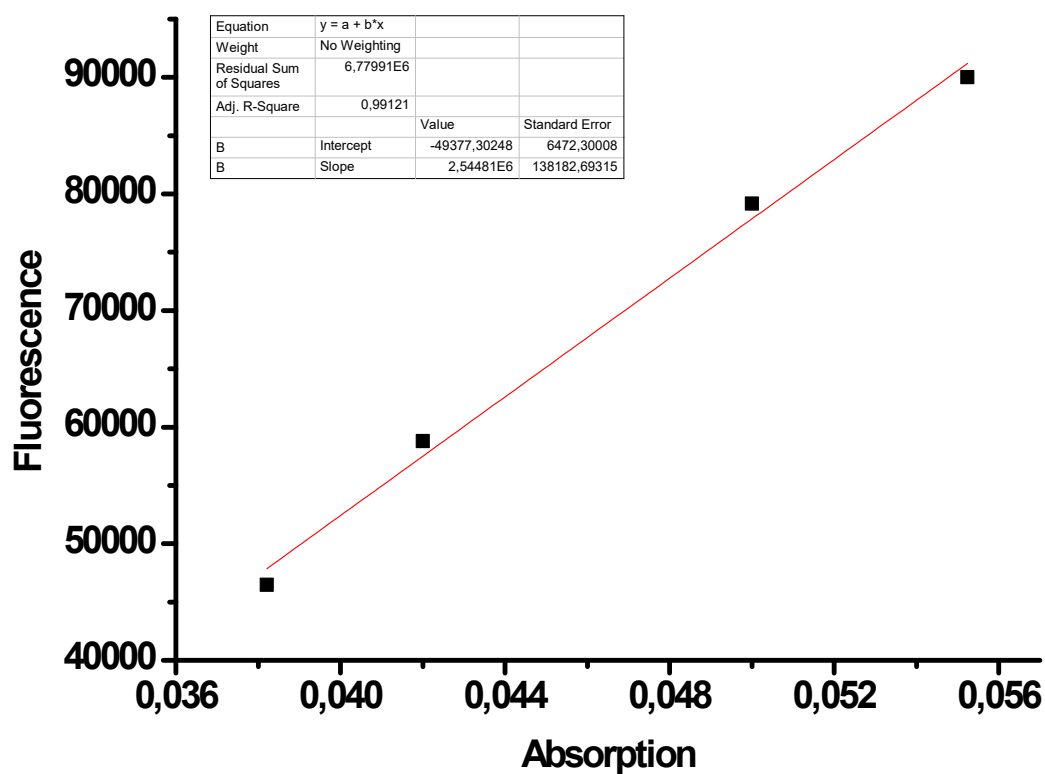

**Figure S46.** Fluorescence intensity dependence of absorbance for nanoparticles PLGA-8.  
 $y = 2\,544\,815,4164x - 49\,377,3799$ ,  $R^2 = 0,9912$

**Table S3.** Spectral properties of the obtained dyes and brightness of nanoparticles in comparison with the properties of common fluorescent markers

|   | Dye                           | $\lambda_{\text{abs}}$ ,<br>nm | $\lambda_{\text{fl}}$ ,<br>nm | Stokes<br>shift, nm | Molar<br>extinction<br>coefficient of<br>dye, $\epsilon$ ,<br>$\text{l}\cdot\text{mol}^{-1}\cdot\text{cm}^{-1}$ | Fluorescence<br>quantum yield<br>of dye, % | Brightness<br>of NP, per<br>mg of NP<br>material |
|---|-------------------------------|--------------------------------|-------------------------------|---------------------|-----------------------------------------------------------------------------------------------------------------|--------------------------------------------|--------------------------------------------------|
| 1 | Sulfo-Cy3                     | 548                            | 563                           | 15                  | 162000                                                                                                          | 10                                         | $2,003\cdot 10^{19}$                             |
| 2 | Cy3                           | 544                            | 557                           | 13                  | 133000                                                                                                          | 7                                          | $2,547\cdot 10^{19}$                             |
| 3 | Cy5                           | 646                            | 658                           | 12                  | 200000                                                                                                          | 40                                         | $2,128\cdot 10^{19}$                             |
| 4 | Fluorescein<br>isothiocyanate | 500                            | 541                           | 41                  | 92300                                                                                                           | 97                                         | $6,690\cdot 10^{17}$                             |
| 5 | <b>4</b>                      | 400                            | 546                           | 146                 | 11740                                                                                                           | 3,2                                        | $7,469\cdot 10^{20}$                             |
| 6 | <b>5</b>                      | 375                            | 457                           | 82                  | 12200                                                                                                           | 72                                         | $1,066\cdot 10^{21}$                             |
| 7 | <b>8</b>                      | 374                            | 457                           | 83                  | 12500                                                                                                           | 78                                         | $8,080\cdot 10^{20}$                             |

**Table S4.** Average lifetimes of excited states of fluorophores in free form and in nanoparticles

| Fluorophore | Excited state lifetime of free dye, ns | Excited state lifetime of dye in the nanoparticles, ns |
|-------------|----------------------------------------|--------------------------------------------------------|
| <b>1</b>    | 0,45                                   | 5,58                                                   |
| <b>2</b>    | 0,36                                   | 4,00                                                   |
| <b>3</b>    | 0,40                                   | 4,07                                                   |
| <b>4</b>    | 0,68                                   | 5,35                                                   |
| <b>5</b>    | 4,68                                   | 4,56                                                   |
| <b>6</b>    | 5,05                                   | 4,93                                                   |
| <b>7</b>    | 5,50                                   | 4,57                                                   |
| <b>8</b>    | 5,59                                   | 5,59                                                   |

**Table S5.** Dependence of the average size of nanoparticles (nm) from PLGA-4 and PLGA-8 polymers on time in experiments to study stability during incubation at 37 °C in PBS, RPMI-1640 and DMEM media.

| Nanoparticle type | Time, h | Nanoparticle size and size distribution |                |
|-------------------|---------|-----------------------------------------|----------------|
|                   |         | Average diameter, nm                    | PDI            |
| PBS               |         |                                         |                |
| PLGA-4            | 0       | 125,9 ± 1,3                             | 0,139 ± 0,030  |
|                   | 1       | 138,0 ± 1,7                             | 0,156 ± 0,023  |
|                   | 2       | 139,2 ± 2,3                             | 0,203 ± 0,008  |
|                   | 3       | 131,0 ± 2,0                             | 0,180 ± 0,016  |
|                   | 4       | 132,2 ± 2,1                             | 0,194 ± 0,012  |
|                   | 5       | 142,4 ± 2,0                             | 0,172 ± 0,008  |
|                   | 6       | 132,7 ± 2,0                             | 0,161 ± 0,023  |
|                   | 24      | 106,7 ± 2,3                             | 0,173 ± 0,018  |
|                   | 48      | 130,1 ± 1,9                             | 0,183 ± 0,015  |
| PLGA-8            | 0       | 126,8 ± 3,0                             | 0,113 ± 0,022  |
|                   | 1       | 130,9 ± 3,5                             | 0,119 ± 0,005  |
|                   | 2       | 110,6 ± 1,5                             | 0,105 ± 0,002  |
|                   | 3       | 111,8 ± 2,0                             | 0,1127 ± 0,030 |
|                   | 4       | 109,9 ± 1,0                             | 0,106 ± 0,045  |
|                   | 5       | 109,4 ± 2,2                             | 0,124 ± 0,008  |
|                   | 6       | 112,6 ± 2,1                             | 0,112 ± 0,032  |
|                   | 24      | 125,4 ± 2,2                             | 0,151 ± 0,013  |
|                   | 48      | 110,4 ± 2,0                             | 0,133 ± 0,021  |
| RPMI-1640         |         |                                         |                |
| PLGA-4            | 0       | 128,2 ± 2,3                             | 0,140 ± 0,011  |
|                   | 1       | 128,1 ± 2,4                             | 0,157 ± 0,006  |
|                   | 2       | 133,4 ± 2,0                             | 0,179 ± 0,019  |
|                   | 3       | 133,7 ± 2,2                             | 0,127 ± 0,026  |
|                   | 4       | 133,8 ± 3,0                             | 0,139 ± 0,008  |
|                   | 5       | 132,1 ± 2,5                             | 0,150 ± 0,012  |
|                   | 6       | 131,8 ± 2,0                             | 0,153 ± 0,031  |
|                   | 24      | 129,7 ± 2,0                             | 0,183 ± 0,025  |
|                   | 48      | 188,7 ± 1,1                             | 0,365 ± 0,016  |
| PLGA-8            | 0       | 113,7 ± 1,9                             | 0,111 ± 0,004  |

|        |    |             |                |
|--------|----|-------------|----------------|
|        | 1  | 109,6 ± 2,0 | 0,112 ± 0,009  |
|        | 2  | 116,7 ± 2,4 | 0,122 ± 0,033  |
|        | 3  | 113,8 ± 2,1 | 0,200 ± 0,010  |
|        | 4  | 117,3 ± 2,3 | 0,154 ± 0,026  |
|        | 5  | 111,6 ± 2,4 | 0,123 ± 0,009  |
|        | 6  | 112,6 ± 2,0 | 0,130 ± 0,011  |
|        | 24 | 113,6 ± 2,2 | 0,171 ± 0,028  |
|        | 48 | 247,1 ± 3,8 | 0,379 ± 0,012  |
| DMEM   |    |             |                |
|        | 0  | 129,1 ± 2,0 | 0,139 ± 0,008  |
|        | 1  | 128,7 ± 2,5 | 0,136 ± 0,028  |
|        | 2  | 128,7 ± 3,0 | 0,172 ± 0,006  |
|        | 3  | 129,3 ± 2,2 | 0,196 ± 0,011  |
| PLGA-4 | 4  | 130,8 ± 2,5 | 0,203 ± 0,0004 |
|        | 5  | 131,1 ± 2,3 | 0,187 ± 0,013  |
|        | 6  | 130,9 ± 3,0 | 0,196 ± 0,014  |
|        | 24 | 138,6 ± 2,7 | 0,192 ± 0,018  |
|        | 48 | 129,1 ± 3,6 | 0,204 ± 0,003  |
|        | 0  | 115,9 ± 2,0 | 0,102 ± 0,015  |
|        | 1  | 116,4 ± 2,2 | 0,105 ± 0,014  |
|        | 2  | 114,5 ± 3,1 | 0,108 ± 0,016  |
|        | 3  | 112,2 ± 2,4 | 0,116 ± 0,007  |
| PLGA-8 | 4  | 116,1 ± 2,1 | 0,115 ± 0,009  |
|        | 5  | 113,4 ± 2,3 | 0,148 ± 0,012  |
|        | 6  | 110,3 ± 2,2 | 0,138 ± 0,016  |
|        | 24 | 113,8 ± 2,5 | 0,135 ± 0,024  |
|        | 48 | 115,9 ± 2,1 | 0,144 ± 0,030  |

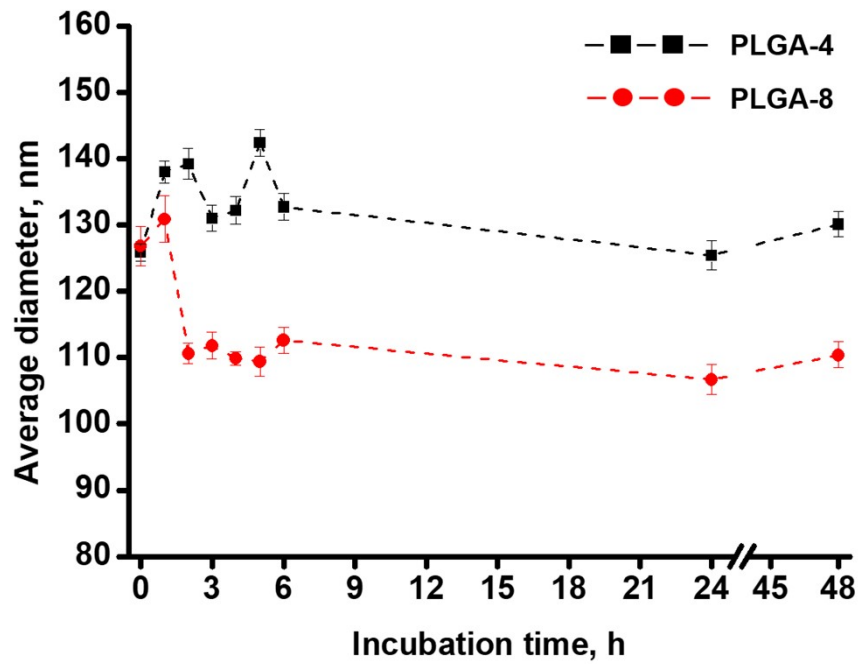

**Figure S47.** Dependence of the average size of nanoparticles (nm) from PLGA-4 and PLGA-8 polymers on time in experiments to study stability during incubation at 37 °C in PBS media.

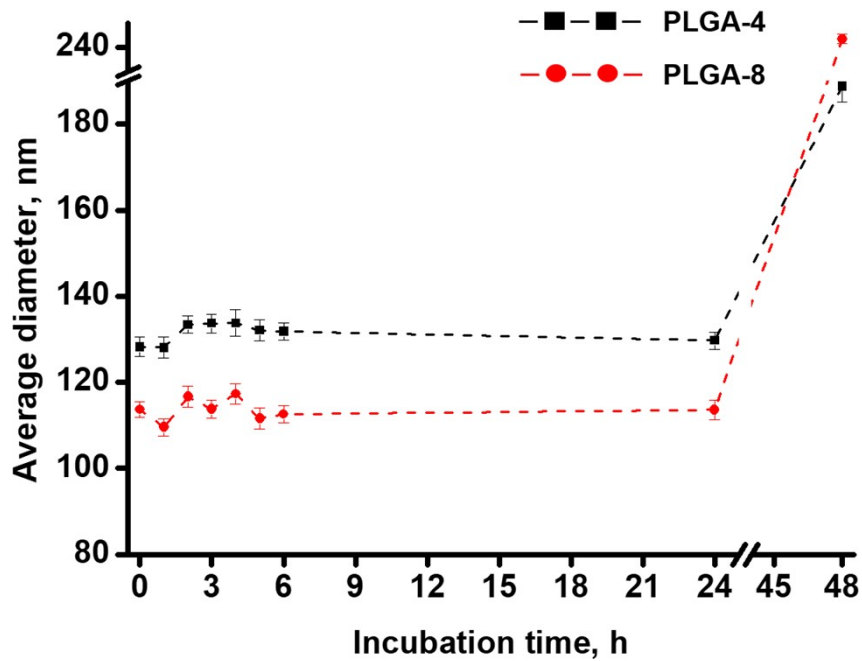

**Figure S48.** Dependence of the average size of nanoparticles (nm) from PLGA-4 and PLGA-8 polymers on time in experiments to study stability during incubation at 37 °C in RPMI-1640 media.

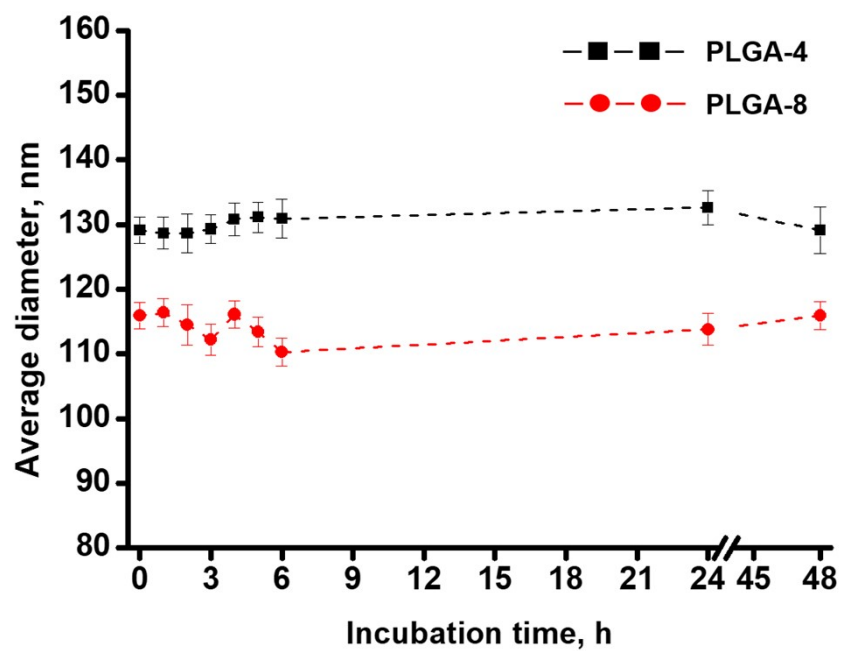

**Figure S49.** Dependence of the average size of nanoparticles (nm) from PLGA-4 and PLGA-8 polymers on time in experiments to study stability during incubation at 37 °C in DMEM media.

**Table S6.** Dependence of the average fluorescence intensity, relative to the initial value and expressed as a percentage, for nanoparticles made of PLGA-4 and PLGA-8 polymers, on time during incubation at 37 °C in PBS, RPMI-1640 and DMEM media

| Time, h | PBS       |           | RPMI-1640 |           | DMEM      |           |
|---------|-----------|-----------|-----------|-----------|-----------|-----------|
|         | PLGA-4    | PLGA-8    | PLGA-4    | PLGA-8    | PLGA-4    | PLGA-8    |
| 0,00    | 100,0±3,0 | 100,0±3,5 | 100,0±3,1 | 100,0±4,1 | 100,0±1,0 | 100,0±1,0 |
| 1,00    | 69,8±4,5  | 93,0±2,6  | 65,9±8,4  | 100,2±3,9 | 83,3±2,5  | 101,8±1,0 |
| 2,00    | 53,1±2,8  | 95,7±4,7  | 42,1±17,2 | 99,1±1,1  | 48,2±15,4 | 104,6±1,8 |
| 3,00    | 28,2±1,6  | 91,9±3,03 | 24,9±14,1 | 98,2±2,3  | 30,0±12,1 | 106,5±1,0 |
| 4,00    | 21,3±1,0  | 93,1±1,0  | 20,7±8,9  | 99,2±1,0  | 21,4±9,2  | 102,1±0,8 |
| 5,00    | 15,5±1,8  | 95,9±1,2  | 17,6±4,5  | 105,5±2,7 | 17,2±4,9  | 105,4±3,7 |
| 6,00    | 14,2±1,2  | 92,6±3,5  | 16,2±2,0  | 101,3±3,2 | 16,8±7,1  | 105,5±1,9 |
| 48,00   | 10,7±1,0  | 107,2±1,1 | 11,4±1,3  | 108,2±3,4 | 10,9±1,0  | 110,8±1,0 |

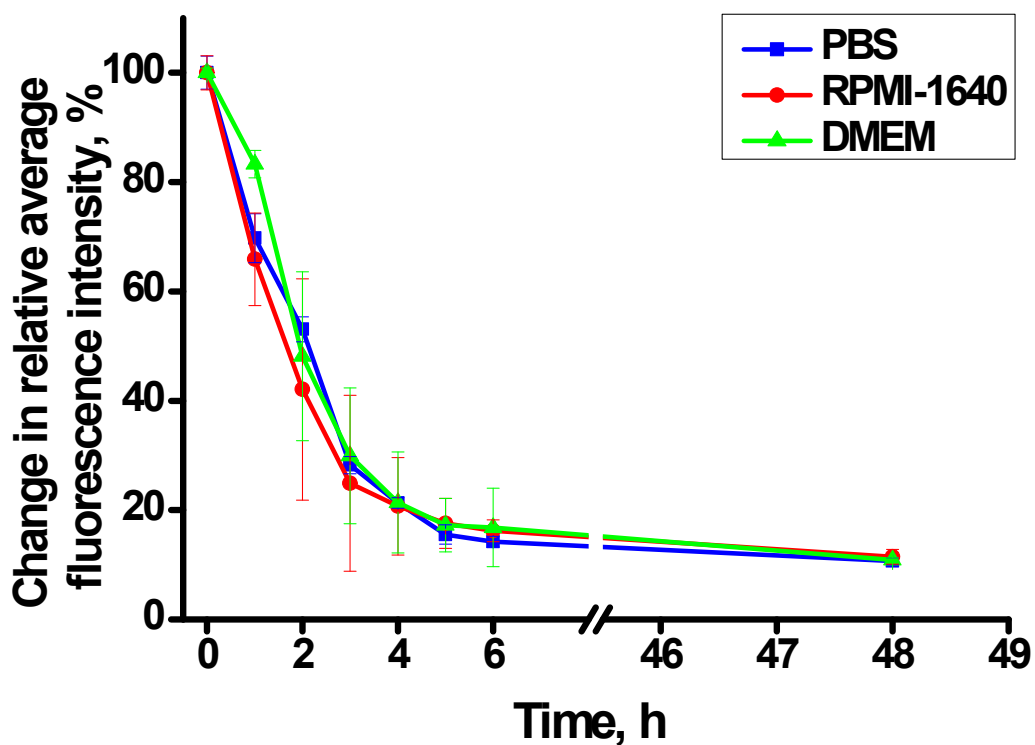

**Figure S50.** Dependence of the relative average fluorescence intensity of PLGA-4 nanoparticles on time during incubation at 37 °C in PBS, RPMI-1640 and DMEM media

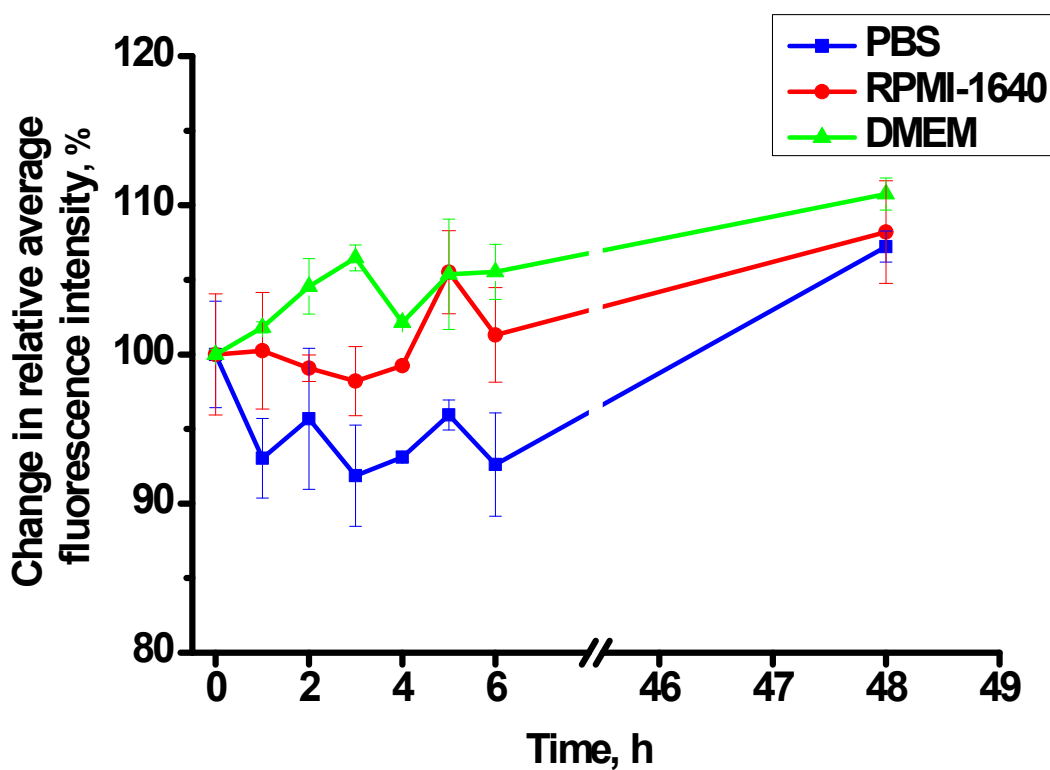

**Figure S51.** Dependence of the relative average fluorescence intensity of PLGA-8 nanoparticles on time during incubation at 37 °C in PBS, RPMI-1640, and DMEM media

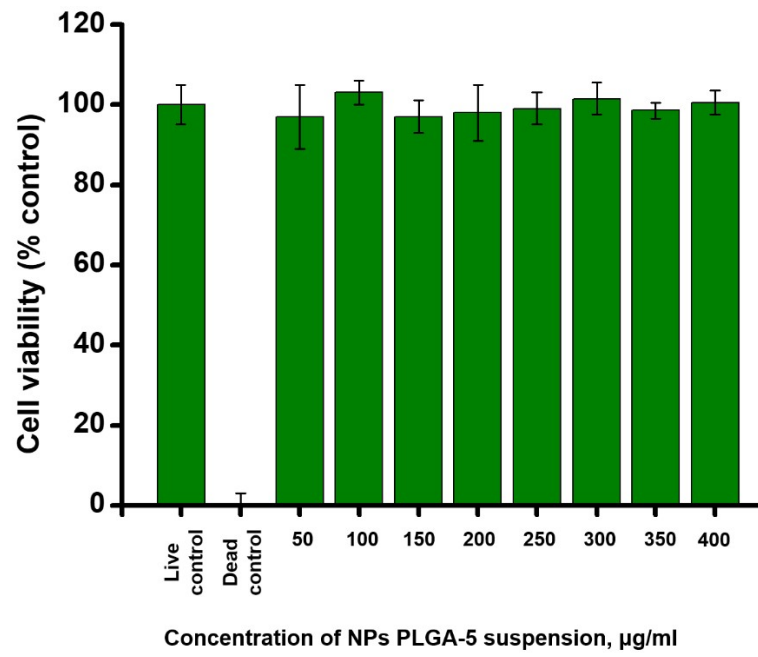

**Figure S52.** A study of the cytotoxicity of PLGA-5 nanoparticles on the mouse breast carcinoma cell line 4T1 performed using a resazurin assay (Alamar Blue assay). Cell viability was assessed after 24-hour incubation. The experiment was performed in triplicate (n=3).

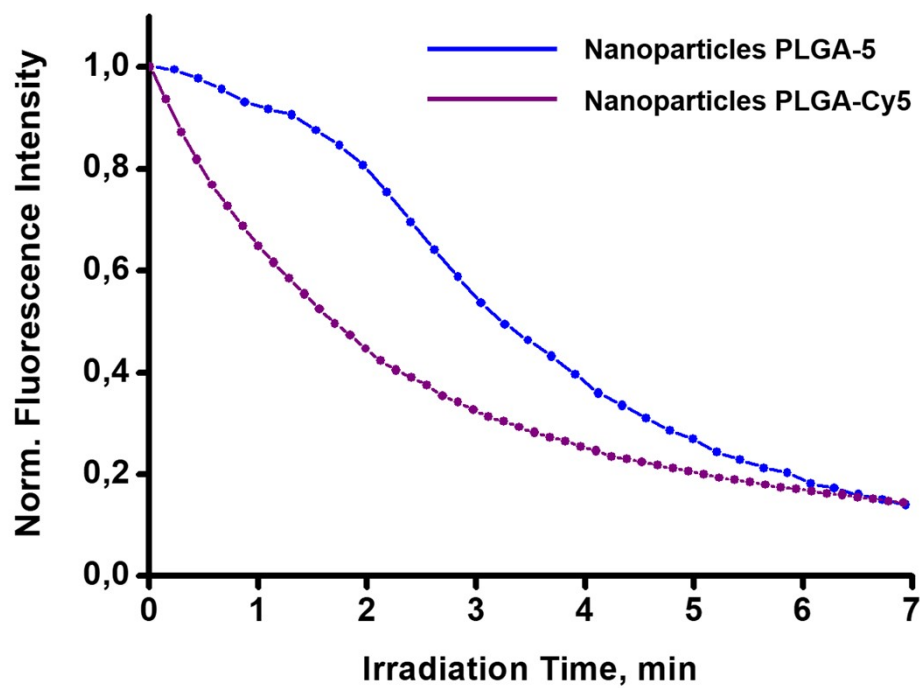

**Figure S53.** Time-dependent fluorescence intensity profiles of PLGA-naphthalimide 5 (blue) and PLGA-Cy5 (violet) nanoparticles following 7 min incubation. Selected regions of interest (ROI) were continuously bleached using 405 nm laser (PLGA-5) and 637 nm laser (PLGA-Cy5) over a 7 min irradiation period.

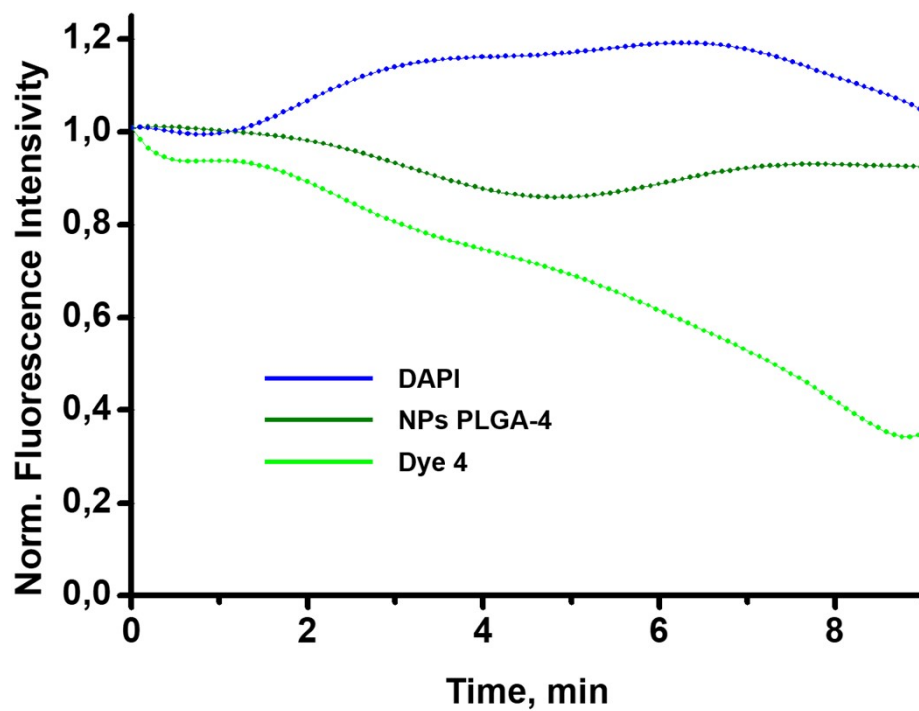

**Figure S54.** Time-dependent fluorescence intensity profiles of DAPI (blue) and PLGA-naphthalimide 4 nanoparticles (green) and dye 4 (light green) following 9 min incubation. Selected regions of interest (ROI) were continuously bleached using 405 nm laser over a 9 min irradiation period.

## References

1. Choi S. *Yonsei Med. J.*, 2021, **62**, 11, 1042-1051.
2. Zhukova V. *Pharmaceutics*, 2021, **13**, 8, 1145.
3. Geng J. *Small*, 2013, **9**, 11, 2012-2019.
4. Liu M. *Pharmaceutics (Basel)*, 2023, **16**, 6, 818-832.
5. Shahroosvand Z., Yeganeh N.R., Haddadian S. *Appl. Nanosci.*, 2020, **10**, 1441–1452
6. Reul R. *Polym. Chem.*, 2012, **3**, 3, 694–702.
7. Czerney P. *Biol. Chem.*, 2001, **382**, 3, 495-498.
8. Kim J. S. J. *Colloid Interface Sci.*, 2011, **353**, 363-371.
9. Galliani M. *Chempluschem.*, 2019, **84**, 11, 1653-1658.
10. Win K. W. *Small.*, 2015, **11**, 9, 1197-1204.
